# Supplementary material for: Late Paleocene CO 2 drawdown, climatic cooling, and terrestrial denudation in the southwest Pacific
Source: Copernicus journal article supplement (doi:10.5194/cp-2021-122), 2021-09-17
Supplement: Supplementary file 1 [file cp-2021-122-supplement.zip]

Archive with 8 entries (8 files):
- Hollis_WOF_Supplement.pdf
- Table_S1_Sample_data.xlsx
- Table_S2_WOF_data.xlsx
- Table_S3_Density_fractions.xlsx
- Table_S4_CSIA.xlsx
- Table_S5_PyGCMS.xlsx
- Table_S6_GDGTs&Fatty_acids.xlsx
- Table_S7_Mead Str carbonate+age.xlsx
