# Supplementary material for: Late Paleocene CO 2 drawdown, climatic cooling, and terrestrial denudation in the southwest Pacific
Source: Copernicus journal article supplement (doi:10.5194/cp-2021-122), 2021-09-17
Supplement: Supplementary file 1 [file cp-2021-122-supplement.zip › Table_S2_WOF_data.xlsx]

## Sheet: Table
Table S2. Bulk geochemical and palynofacies data for study samples.
Black's Quarry section
Data source: This study
Additional reference: Hollis et al., 2006
Notes: Stratigraphy complex. Heights not considered reliable
Sample no.	Height	Formation	EA-IRMS		Bulk pyrolysis								Palynofacies (%)
	(m)		%COM	δ13COM	S1	S2	S3	Tmax	TOC	HI	OI	PI	Marine			Terrestrial
			(%)	(‰)	(mg HC/g	(mg HC/g	(mg CO2/g	(°C)	(wt%)	(mg HC/g	(mg CO2/g	(-)	AOM	Marine	Total	Degraded	Other	Total	Terrestrial	Total
					rock)	rock)	rock)			TOC)	TOC)			palynomorphs	marine	phytoclasts	phytoclasts	phytoclasts	palynomorphs	Terrestrial
BQ1	4.71	Waipawa	10.42	-19.9									1.19403	0.597015	1.49254	95.2239	1.79104	97.0149	1.19403	98.209
BQ2	5.67	Waipawa	9.8	-20.2	3.415	36.145	0.445	419.5	9.565	377.5	5	0.085	0	1.63934	0	93.4426	3.60656	97.0492	1.31148	98.3607
BQ3	5.18	Waipawa	10.12	-20.2									0.58651	2.93255	0.58651	91.4956	4.69208	96.1877	0.293255	96.4809
BQ3A	2.59	Waipawa	11.02	-20.5									0	0.986842	0	93.0921	4.93421	98.0263	0.986842	99.0132
BQ4	4.3	Waipawa	11.1	-19.3	4.5	44.54	0.38	420	10.84	411	4	0.09	0	1.35593	0.677966	95.9322	2.71186	98.6441	0	98.6441
BQ5	5.24	Waipawa	3.94	-23.5
BQ6	5.33	Waipawa	3.64	-22.6
BQ7	5.07	Waipawa	3.29	-23.1
BQ8	5.02	Waipawa	3.22	-22.8
BQ9	4.8	Waipawa	3.46	-22.8
BQ10	1.49	Waipawa	1.49	-23.9
Correlation (r)	δ13COM		0.973431	1									0.0388903	-0.15349	0.502136	0.784662	-0.702932	0.475643	-0.588033	0.118604
Correlation (r)	%COM		1	0.973431									-0.253174	-0.459708	0.0624621	0.482768	-0.0388601	0.83631	-0.445742	0.556709
Te Hoe River section
Data source: Hollis and Manzano-Kareah, 2005; Schiøler et al., 2010; Hollis et al., 2014
Additional reference: Moore et al., 1987
Notes: Section no longer exposed
Sample no.	Height	Formation	EA-IRMS		Bulk pyrolysis								Palynofacies (%)
	(m)		%COM	δ13COM	S1	S2	S3	Tmax	TOC	HI	OI	PI	Marine			Terrestrial
			(%)	(‰)	(mg HC/g	(mg HC/g	(mg CO2/g	(°C)	(wt%)	(mg HC/g	(mg CO2/g	(-)	AOM	Marine	Total	Degraded	Other	Total	Terrestrial	Total
					rock)	rock)	rock)			TOC)	TOC)			palynomorphs	marine	phytoclasts	phytoclasts	phytoclasts	palynomorphs	Terrestrial
TH-Z	26.1	Wanstead	0.09	-29.2									0.943396	0.314465	1.25786	2.83019	83.6478	86.478	10.6918	97.1698
TH-Z1	25.95	Wanstead	0.22	-26.5									0	0.634921	0.634921	2.22222	93.6508	95.873	3.1746	99.0476
TH-Z2	25.7	Wanstead	0.88	-27.7									44.9838	10.0324	55.0162	16.1812	19.4175	35.5987	8.41424	44.0129
TH-Y	24.1	Wanstead	0.88	-26.7	0.03	0.28	0.25	414.6	0.78	36	32	0.09	20.1278	9.26518	29.393	31.3099	22.0447	53.3546	16.6134	69.9681
TH-X	22.3	Wanstead	1.2	-25.7	0.03	0.22	0.39	401	0.96	23	40	0.11	18.2692	19.5513	37.8205	19.5513	30.4487	50	10.2564	60.2564
TH-W	20.6	Waipawa	2.57	-21.1	0.05	2.03	0.53	415.3	2.04	100	26	0.02	0.636943	0.318471	0.955414	21.0191	72.6115	93.6306	3.82166	97.4522
TH-V1	18.1	Waipawa	1.58	-22.2	0.05	0.86	0.49	411.8	1.31	66	38	0.05	4.59016	1.63934	6.22951	41.9672	30.8197	72.7869	14.7541	87.541
TH-V	18	Waipawa	1.16	-22.2	0.02	0.34	0.45	416.2	0.94	36	48	0.06	7.66773	2.55591	10.2236	32.9073	39.2971	72.2045	15.016	87.2204
TH-U	16.1	Whangai	0.83	-25.95	0.02	0.15	0.39	417.1	0.66	23	59	0.12	19.7411	7.44337	27.1845	25.89	26.2136	52.1036	15.534	67.6375
TH-T	14.6	Whangai	0.66	-27.3	0.01	0.13	0.35	414.4	0.64	20	55	0.1	38.4127	11.1111	49.5238	15.2381	21.5873	36.8254	12.6984	49.5238
TH-S	14.3	Whangai	0.76	-27.2	0.01	0.23	0.36	414.7	0.78	29	46	0.05	15.7556	22.1865	37.9421	28.2958	23.1511	51.4469	9.32476	60.7717
TH-R	12.9	Whangai	0.7	-27.1									34.2857	33.6508	67.9365	10.7937	9.20635	20	10.7937	30.7937
TH-Q	12.3	Whangai	0.72	-26.3									7.54098	41.3115	48.8525	16.0656	23.6066	39.6721	10.4918	50.1639
TH-P	11.8	Whangai	0.55	-27.4									7.30159	20.9524	28.254	18.0952	46.3492	64.4444	6.98413	71.4286
TH-O	10.9	Whangai	0.73	-28.1
TH-N	10	Whangai	0.63	-28.4
TH-M	9	Whangai	0.63	-27.7
TH-K	9	Whangai	0.52	-27.5
TH-L	8.1	Whangai	0.52	-27.5
TH-J	4.5	Whangai	0.5	-28.2
TH-H	4.4	Whangai	0.46	-28.5
TH-I	2.3	Whangai	0.73	-27.15
TH-G	0.55	Whangai	0.85	-27.3
TH-F	0.1	Whangai	0.54	-27
TH-D	0.05	Whangai	0.88	-26.6
TH-E	0.05	Whangai	0.87	-27.1
TH-C	-0.02	Whangai	0.93	-27.3
TH-B	-0.1	Whangai	0.94	-27
TH-A	-0.3	Whangai	0.89	-27.4
Correlation (r)	δ13COM		0.834039	1	0.747309	0.766527	0.877814	0.100514	0.81805	0.808718	-0.477634	-0.678238	-0.397861	-0.34924	-0.466321	0.607907	0.0942537	0.403509	0.0477481	0.435248
Correlation (r)	TOC		0.993211	0.81805	0.830386	0.981651	0.777399	-0.0197222	1	0.965788	-0.749474	-0.764895	-0.759958	-0.548583	-0.773734	0.0623966	0.924772	0.902452	-0.693816	0.802088
Tawanui Section
Data source: Tayler, 2011; Hollis et al., 2014
Additional reference:
Notes:
Sample no.	Height	Formation	EA-IRMS
	(m)		%COM	δ13COM
			(%)	(‰)
MT1.49	50	-27.1	0.4	-27.1
TW1134	47.2	-25.7	0.24	-25.7
TW1032	42	-25.7	0.41	-25.7
TWC6	40.8	-20.8	1.2	-20.8
MT1.72	40.7	-20	0.6	-20
TWC5	40.5	-20.7	0.74	-20.7
TWC4	40.2	-22.1	0.69	-22.1
MT1.46	39.9	-24.9	0.2	-24.9
MT1.44	39.7	-25	0.2	-25
TW0929	39.5	-24.9	0.12	-24.9
TWC3	39.4	-25.3	0.19	-25.3
MT1.45	39.3	-25.9	0.1	-25.9
TWC2	39.2	-25.2	0.35	-25.2
MT1.42	39.05	-26.4	0.3	-26.4
MT1.41	39	-26.2	0.3	-26.2
TWC1	38.5	-26.3	0.62	-26.3
MT1.39	38.4	-26.5	0.5	-26.5
MT1.37	37.9	-26.2	0.3	-26.2
MT1.35	37.4	-26.8	0.3	-26.8
MT1.32	36.7	-26.8	0.5	-26.8
MT1.31	36.1	-26.6	0.2	-26.6
MT1.30	35.7	-26.9	0.1	-26.9
MT1.28	35.2	-26.8	0.3	-26.8
MT1.27	34.9	-26.9	0.3	-26.9
MT1.71	31.4	-28.5	0.3	-28.5
MT1.70	29.7	-28.3	0.4	-28.3
MT1.68	24.2	-28.4	0	-28.4
Correlation (r)	δ13COM		0.655446	1
Correlation (r)	TOC		1	0.655446
Taylor White section
Data source: Naeher et al., 2019
Additional reference:
Notes:
Sample no.	Height	Formation	EA-IRMS		Bulk pyrolysis								Palynofacies (%)
	(m)		%COM	δ13COM	S1	S2	S3	Tmax	TOC	HI	OI	PI	Marine			Terrestrial
			(%)	(‰)	(mg HC/g	(mg HC/g	(mg CO2/g	(°C)	(wt%)	(mg HC/g	(mg CO2/g	(-)	AOM	Marine	Total	Degraded	Other	Total	Terrestrial	Total
					rock)	rock)	rock)			TOC)	TOC)			palynomorphs	marine	phytoclasts	phytoclasts	phytoclasts	palynomorphs	Terrestrial
TW-70	167	Wanstead		-25.9	0	0.04	0.37	373.1	0.12	32	321	0.05
TW-69	165.5	Wanstead		-25.23	0	0.03	0.11	349.2	0.03	113	406	0
TW-67	162.5	Wanstead		-26.11	0.01	0.06	0.29	426.5	0.16	36	176	0.16
TW-65	159.5	Wanstead		-25.7	0.01	0.03	0.2	419.7	0.07	44	297	0.16
TW-63	156.5	Wanstead		-25.9	0	0.04	0.23	426.7	0.12	34	184	0.08
TW-61	153.5	Wanstead		-26.74	0	0.04	0.13	429.9	0.08	43	153	0.05
TW-59	150.5	Wanstead		-25.55	0	0.04	0.31	432.6	0.44	8	71	0.09
TW-57	147.5	Wanstead		-25.43	0	0.01	0.3	402.8	0.13	7	233	0.28	61.7	2.4	64.1	4	27.5	31.5	1.1	32.6
TW-55	144.5	Wanstead		-26.6	0	0.01	0.22	432.1	0.23	5	97	0.19
TW-54	143	Wanstead		-26.8	0	0.04	0.23	425.9	0.19	21	121	0.04	4.1	7.6	11.7	41.3	44.2	85.5	1.7	87.2
TW-53	141.5	Wanstead		-26.6	0	0.1	0.27	418.9	0.27	35	99	0	10.4	4.6	15	51.9	21.5	73.4	1.7	75.1
TW-52A	140.25	Waipawa		-23.08	0.01	0.09	0.28	413	0.29	30	96	0.13
TW-52	140	Waipawa		-21.7	0.02	0.17	0.29	417.969	0.21	82	139	0.11	3	13.3	16.3	30.5	42.4	72.9	4.4	77.3
TW-51C	139.5	Waipawa		-22.84	0.01	0.07	0.23	418	0.36	21	64	0.1	2.8	11.3	14.1	43.7	29.8	73.5	4.9	78.4
TW-51B	139	Waipawa		-21.54	0.08	0.23	0.41	414.3	0.63	36	65	0.26
TW-51A	138.5	Waipawa		-21.03	0.1	0.49	0.45	412.7	0.9	55	50	0.16	3	4.5	7.5	82.4	5	87.4	0.5	87.9
TW-51	138	Waipawa		-18.89	0.14	6.08	0.68	404.6	2.76	221	25	0.02	0.5	8.3	8.8	50.8	25.4	76.2	7.8	84
TW-50	137	Waipawa		-18.56	0.13	7.74	0.81	401	3.27	237	25	0.02	0	0.9	0.9	98.3	0	98.3	0	98.3
TW-49	135.5	Waipawa		-18.61	0.13	8.54	1.02	404.6	3.79	225	27	0.02	0.4	3.7	4.1	76.4	9	85.4	0.7	86.1
TW-48	134	Waipawa		-18.92	0.07	6.83	0.94	405.5	3.3	207	29	0.01
TW-47	132.5	Waipawa		-16.67	0.04	2.85	0.47	421.5	1.74	164	27	0.02	0	0	0	86.6	8.7	95.3	0	95.3
TW-46	131	Waipawa		-21.01	0.02	3.03	0.62	414.2	1.77	171	35	0.01
TW-45	129.5	Waipawa		-21.15	0.08	3.42	0.61	406.9	2.17	157	28	0.02
TW-44	128	Whangai		-25.06	0.02	1.39	0.33	431.2	1.23	113	27	0.01	35.2	22.4	57.6	22.7	7.3	30	3.9	33.9
TW-43	126.5	Waipawa		-21.52	0.06	6.04	0.42	417.371	2.17	279	19	0.01	1	7.2	8.2	65.2	15.5	80.7	6.3	87
TW-42	125	Waipawa		-18.27	0.11	5.42	1.02	401.9	3.21	169	32	0.02
TW-41	123.5	Waipawa		-21.22	0.04	6.17	0.46	415.6	2.21	279	21	0.01	0	4.6	4.6	79.7	9.3	89	3	92
TW-40	122	Waipawa		-18.6	0.09	6.89	0.48	411.8	2.33	295	21	0.01
TW-39	120.5	Waipawa		-18.55	0.13	10.1	1.39	407.5	4.26	237	33	0.01
TW-38	119	Waipawa		-17.83	0.16	9.68	1.21	405.1	4.53	214	27	0.02	0	3.1	3.1	52.1	23.4	75.5	6.1	81.6
TW-37	117.5	Waipawa		-17.63	0.13	9.02	2.82	411.4	4.62	195	61	0.01	0	3.3	3.3	65.6	20.8	86.4	5.9	92.3
TW-36	116	Waipawa		-20.06	0.03	2.13	2.21	424.6	1.87	114	119	0.01
TW-35	114.5	Waipawa		-24.13	0.02	1.64	1.23	415.4	1.61	102	76	0.01	0.9	6.4	7.3	61.6	18	79.6	3	82.6
TW-34	113	Waipawa		-21.32	0.02	1.27	1.75	424.2	1.43	89	123	0.02
TW-33	111.5	Waipawa		-20.56	0.02	0.54	2.34	426.4	1.33	41	176	0.03
TW-32	110	Waipawa		-22.83	0.03	1.39	1.81	424.1	1.49	93	121	0.02	0.8	8	8.8	70.7	13.7	84.4	3.8	88.2
TW-31	108.5	Waipawa		-22.08	0.03	0.82	2.3	428.2	1.46	56	157	0.04	0.3	7.3	7.6	47.5	20.6	68.1	14.4	82.5
TW-30	107	Waipawa		-19.84	0.08	3.59	2.39	416.1	2.45	146	97	0.02
TW-29	105.5	Waipawa		-18	0.11	7.36	2.68	410.2	3.96	186	68	0.01	0	6.1	6.1	56	27.1	83.1	3.4	86.5
TW-28	104	Waipawa		-20.16	0.07	4.22	1.32	415	2.43	173	54	0.02
TW-27	102.5	Waipawa		-21.61	0.05	1.59	2.33	425.2	1.69	94	137	0.03
TW-26	101	Waipawa		-20.8	0.04	2.35	1.08	413.9	1.94	121	56	0.02	1	3	4	65.8	21.8	87.6	5.4	93
TW-25	99.5	Waipawa		-19.45	0.1	4.02	0.65	403	2.42	167	27	0.03	0	0.4	0.4	83.5	8.5	92	1.7	93.7
TW-24	98	Waipawa		-19.73	0.08	3.6	0.64	406.2	2.26	160	28	0.02
TW-23	96.5	Waipawa		-17.38	0.27	12.35	1.16	403.7	4.58	269	25	0.02	0.7	3.6	4.3	74.7	10.5	85.2	1.6	86.8
TW-22	95	Waipawa		-18.58	0.07	5.41	1.02	408.6	2.91	186	35	0.01
TW-21	93.5	Waipawa		-19.64	0.11	4.11	1.02	409.9	2.45	168	42	0.03
TW-20	92	Waipawa		-18.7	0.07	7.12	0.71	416.1	2.54	280	28	0.01	0	5.7	5.7	67.2	17.2	84.4	7	91.4
TW-19	90.5	Waipawa		-23.25	0.03	0.89	1.23	425.3	1.41	63	87	0.03	1.4	3.4	4.8	61.8	15.2	77	2.4	79.4
TW-18	89	Waipawa		-18.63	0.11	6.86	1.54	409.3	3.21	214	48	0.02
TW-17	87.5	Waipawa		-18.2	0.17	4.79	4.16	419.8	3.18	151	131	0.03	0.8	2.1	2.9	68.1	18	86.1	2.1	88.2
TW-16	86	Waipawa		-18.8	0.12	4.3	2.99	420.4	2.91	148	103	0.03	2.5	3.3	5.8	62.8	19.6	82.4	8.8	91.2
TW-15	84.5	Waipawa		-17.71	0.09	2.74	4.46	424.3	2.8	98	160	0.03
TW-14	83	Waipawa		-20.44	0.06	2.84	1.14	413.1	2.02	140	56	0.02	0.6	12.3	12.9	46.8	19.6	66.4	3.6	70
TW-13	81.5	Waipawa		-21.24	0.04	1.9	1.35	420.3	1.76	108	77	0.02	0	4.6	4.6	72.1	11.9	84	1.5	85.5
TW-12	77	Waipawa		-22.34	0.03	0.43	1.36	426.4	0.98	44	140	0.06	0	2.3	2.3	57.5	26.7	84.2	7.2	91.4
TW-11	72.5	Waipawa		-22.8	0.01	0.79	1.15	426.8	1.05	75	109	0.02	0	7.5	7.5	53.5	21.6	75.1	2.1	77.2
TW-10	68	Waipawa		-23.2	0	0.15	1.04	435.6	0.49	30	211	0.02	0	0	0	59.1	37.1	96.2	1	97.2
TW-9	63.5	Whangai		-26.57	0.01	0.51	0.46	420.1	0.8	64	58	0.03	40.5	14.3	54.8	17.3	20.6	37.9	2.7	40.6
TW-8	59	Whangai		-26.4	0.01	0.36	0.82	429.4	0.59	61	139	0.03	1	21.3	22.3	46	25.8	71.8	0.7	72.5
TW-7	54.5	Whangai		-26.19	0.02	0.74	0.63	424.7	0.94	80	68	0.03	55.6	8.3	63.9	17.5	9.1	26.6	3.6	30.2
TW-6	32	Whangai		-27.08	0.03	1.13	0.43	426.6	0.94	120	46	0.03	78.6	7.3	85.9	4.1	3.6	7.7	0.9	8.6
TW-5	26.5	Whangai		-26.27	0.03	1.29	0.36	425.9	1.06	122	34	0.02	1	37.4	38.4	14.6	34.9	49.5	2.4	51.9
TW-4	16	Waipawa		-22.69	0.03	2.52	0.54	425.6	1.33	189	40	0.01
TW-3	10	Waipawa		-21.05	0.06	1.85	1.38	420.9	1.75	106	79	0.03
TW-2	5.5	Waipawa		-17.64	0.13	3.52	3.69	425.6	2.93	120	126	0.04	0	2.7	2.7	73.5	15.1	88.6	2.7	91.3
TW-1	0	Whangai		-26.16	0.02	0.46	0.47	427.6	0.68	68	69	0.05
Correlation (r)	δ13COM			1	0.785388	0.763216	0.550925	-0.237939	0.853613	0.701565	-0.434425	-0.337544	-0.565132	-0.514729	-0.682389	0.722112	-0.265448	0.657748	0.174873	0.674194
Correlation (r)	TOC			0.853613	0.87316	0.934384	0.53233	-0.235698	1	0.804692	-0.539418	-0.491252	-0.363024	-0.335975	-0.44014	0.520091	-0.346654	0.398417	0.155259	0.415103
Angora Road Section
Data source: Tayler, 2011; Hollis et al., 2014
Additional reference:
Notes:
Sample no.	Height	Formation	EA-IRMS
	(m)		%COM	δ13COM
			(%)	(‰)
MT3.141	98.2	Wanstead	0.1	-24.3
MT3.140	97.9	Waipawa Fm	0.2	-22.9
MT3.137	96.75	Waipawa Fm	3.6	-19.7
MT3.133	95.25	Waipawa Fm	2.4	-20.4
MT3.130	89.5	Waipawa Fm	9	-21.6
MT3.127	88.1	Waipawa Fm	1.2	-23.8
MT3.121	86.55	Waipawa Fm	1.8	-22.2
MT3.114	84.9	Waipawa Fm	3.8	-19.5
MT3.103	83.1	Waipawa Fm	3.4	-21.3
MT3.99	81.25	Waipawa Fm	4.1	-19.5
MT3.94	78.9	Waipawa Fm	4.9	-19.6
MT3.90	77.1	Waipawa Fm	3.1	-20.1
MT3.83	74.78	Waipawa Fm	3.1	-20.7
MT3.80	74.15	Waipawa Fm	2.6	-20.7
MT3.108	73.75	Waipawa Fm	2.2	-21.1
MT3.56	73.4	Waipawa Fm	2.2	-20.9
MT3.53	71.9	Waipawa Fm	3.3	-20.7
MT3.49	69.9	Waipawa Fm	3.6	-20.6
MT3.45	67.9	Waipawa Fm	2.2	-20.6
MT3.41	65.9	Waipawa Fm	1.6	-20.8
MT3.38	64.4	Waipawa Fm	1.2	-21.2
MT3.35	63	Waipawa Fm	1.3	-22.1
MT3.30	59.8	Waipawa Fm	2.2	-21.1
MT3.29	58.85	Whangai Fm	1.7	-21.8
MT3.07	5.1	Whangai Fm	0.7	-25.5
Correlation (r)	δ13COM		#REF!	#REF!
Correlation (r)	TOC		#REF!	#REF!
Glendhu Rocks section (Pahaoa River mouth)
Data source: Tayler, 2011 (underlined values); this study
Additional reference:
Notes:
Sample no.	Height	Formation	EA-IRMS		Bulk pyrolysis
	(m)		%COM	δ13COM	S1	S2	S3	Tmax	TOC	HI	OI	PI
			(%)	(‰)	(mg HC/g	(mg HC/g	(mg CO2/g	(°C)	(wt%)	(mg HC/g	(mg CO2/g	(-)
					rock)	rock)	rock)			TOC)	TOC)
GD-13	2.175	Wanstead	0.0797887	-27.14	0	0	0.27	279.6	0.3	0	89
GD-12	1.725	Wanstead	0.0458515	-26.17	0	0	0.32	426.9	0.37	0	87
GD-11	1.375	Wanstead	0.0272396	-25.37	0	0	0.09	536.6	0.03	0	270
GD-10	1.275	Waipawa?	0.0299572	-28.76	0	0	0.13	308.9	0.25	0	52
GD-09	1.075	Wanstead	0.0361335	-28.59	0	0	0.1	412.5	0.09	0	114
GD-08	0.845	Wanstead	0.0316345	-25.86	0	0	0.14	411.8	0.28	0	50
GD-07	0.775	Wanstead	0.0386011	-26.39	0	0	0.17	593.5	0.22	0	75
GD-06	0.675	WOF	0.312743	-22.62	0	0.08	0.2	432.2	0.43	19	48	0
GD-05	0.54	WOF	0.286499	-21.78	0.01	0.08	0.27	425.5	0.41	19	65	0.111111
GD-04	0.425	WOF	0.253925	-22.68	0	0.07	0.22	430.8	0.35	21	64	0
GD-03	0.24	Kaiwhata	0.0579618	-26.16	0	0	0.14	426.2	0.11	2	131
GD-02	0.05	Kaiwhata	0.0462464	-26.36	0	0	0.19	329.3	0.25	0	74
GD-01	-0.05	Kaiwhata	0.1	-27.5	0	0	0.4	337.2	0.35	0	114
GD-18extra	?	WOF?	0.2	-22.5	0	0.07	0.15	433.1	0.33	22	46	0
Correlation (r)	δ13COM		0.859559	1	0.474461	0.906942	0.0719395	0.334218	0.514898	0.903602	-0.216625
Correlation (r)	TOC		0.683619	0.514898	0.333698	0.611239	0.678722	-0.289529	1	0.566502	-0.72098
Orui-1A drillhole
Data source: Field et al., 2018
Additional reference: PR??
Notes: Palynofacies slides prepared by Gehlen, recounted by Clowes
Sample no.	Depth	Formation	EA-IRMS		Bulk pyrolysis								Palynofacies (%)
	(m)		%COM	δ13COM	S1	S2	S3	Tmax	TOC	HI	OI	PI	Marine			Terrestrial
			(%)	(‰)	(mg HC/g	(mg HC/g	(mg CO2/g	(°C)	(wt%)	(mg HC/g	(mg CO2/g	(-)	AOM	Marine	Total	Degraded	Other	Total	Terrestrial	Total
					rock)	rock)	rock)			TOC)	TOC)			palynomorphs	marine	phytoclasts	phytoclasts	phytoclasts	palynomorphs	Terrestrial
Orui1A-1	31.24	Waipawa	1.83558	-22.43	0.05	2.37	0.94	424.2	1.97	121	48	0.0206612
Orui1A-2	37.84	Waipawa	2.67298	-20	0.07	5.09	1.46	421.9	2.58	198	57	0.0135659
Orui1A-3	42.82	Waipawa	4.97707	-18.51	0.17	7.53	1.29	393.7	3.96	190	33	0.0220779
Orui-10b	48.395	Waipawa	4.17675	-20.09	0.16	8.35	1	403.9	3.38	247	29	0.0188014
Orui-10c	48.8	Waipawa	3.06373	-20.29	0.14	5.17	0.79	407.6	2.62	197	30	0.0263653
Orui-10d	49.545	Waipawa	3.16031	-19.91	0.15	5.18	0.82	401	2.47	210	33	0.0281426
Orui-11a	49.9	Waipawa	4.06443	-19.33	0.21	8.9	0.89	401.9	3.33	267	27	0.0230516
Orui1A-4	49.985	Waipawa	2.94269	-19.42	0.1	3.68	0.92	401.4	2.41	153	38	0.026455
Orui-11b	50.19	Waipawa	3.76276	-19.36	0.25	7.69	0.95	402	3.16	243	30	0.0314861
Orui-11c	50.41	Waipawa	3.38532	-19.48	0.16	6	0.82	400.4	2.71	221	30	0.025974
Orui-11d	50.915	Waipawa	4.13024	-19.46	0.19	7.73	1.01	401.2	3.2	241	31	0.0239899
Orui-11e	51.05	Waipawa	3.5753	-19.55	0.15	8.3	0.75	401.8	3	277	25	0.0177515
Orui-11f	51.575	Waipawa	5.28837	-19.29	0.28	13.94	0.96	396.4	4.19	333	23	0.0196906
Orui1A-5	55.67	Waipawa	3.62584	-19.3	0.13	8.12	0.73	400.7	2.94	276	25	0.0157576
Orui1A-6	61.825	Waipawa	2.03712	-21.31	0.03	1.62	0.79	410	1.76	92	45	0.0181818
Orui1A-7	68.335	Waipawa	2.58146	-20.18	0.04	4.03	1.02	426.5	2.29	176	45	0.00982801
Orui1A-8	74.46	Waipawa	1.35437	-22.9	0.01	2.89	0.58	425	1.65	175	35	0.00344828
Orui1A-9	79.875	Waipawa	2.48313	-18.83	0.04	5.52	0.75	425.8	2.12	261	36	0.00719424
Orui1A-11	86.11	Waipawa	3.12001	-18.41	0.06	6.47	1.05	426.1	2.54	255	41	0.00918836
Orui1A-12	92.56	Waipawa	1.51184	-22.27	0.02	2.33	0.77	426.4	1.67	140	46	0.00851064
Orui1A-13	98.375	Waipawa	2.68336	-18.51	0.02	4.78	1.02	427.7	2.18	220	47	0.00416667
Orui1A-14	104.145	Waipawa	2.45151	-18.92	0.02	3.27	1.59	427.5	1.89	173	84	0.00607903
Orui1A-15	109.515	Waipawa	2.3816	-22.75	0.01	3.81	1.91	427.4	2.35	162	81	0.0026178
Orui1A-16	115.7	Waipawa	2.86839	-19.87	0.02	4.33	1.7	427.4	2.26	191	75	0.0045977
MG1	31.23	Wanstead	1.83558	-22.43	0.19	2.92	0.81	417.9	2.85	102.456	28.4211	0.0610932
MG2	37.83	Waipawa	2.67298	-20	0.22	6.3	1.03	414.1	3.59	175.487	28.6908	0.0337423	0.980392	0	0.980392	94.7712	2.61438	97.3856	0	97.3856
MG3	42.8	Waipawa	4.97707	-18.51	0.26	14.09	0.76	394.5	4.7	299.787	16.1702	0.0181185	0	0	0	95.1557	3.46021	98.6159	0	98.6159
MG4	49.96	Waipawa	2.94269	-19.42	0.21	7.94	0.44	408.6	3.15	252.063	13.9683	0.0257669
MG5	55.66	Waipawa	3.62584	-19.3	0.25	10.65	0.58	406.8	3.65	291.781	15.8904	0.0229358	0	0	0	97.2603	1.36986	98.6301	0.342466	98.9726
MG6	61.82	Waipawa	2.03712	-21.31	0.14	3.64	0.46	414.7	2.3	158.261	20	0.037037	0.355872	0.711744	1.06762	86.121	7.82918	93.9502	1.06762	95.0178
MG7	68.32	Waipawa	2.58146	-20.18	0.21	5.27	0.95	421.5	2.97	177.441	31.9865	0.0383212	0.949367	0.632911	1.58228	93.3544	1.89873	95.2532	1.58228	96.8354
MG8	74.44	Waipawa	1.35437	-22.9	0.19	3.72	0.36	421.7	2.76	134.783	13.0435	0.0485934
MG9	79.85	Waipawa	2.48313	-18.83	0.25	6.53	0.49	419.3	3.08	212.013	15.9091	0.0368732
MG11	86.1	Waipawa	3.12001	-18.41	0.2	7.48	0.86	418.4	3.55	210.704	24.2254	0.0260417	0	0	0	97	1	98	1	99
MG12	92.54	Waipawa	1.51184	-22.27	0.14	2.97	1	424.6	2.65	112.075	37.7358	0.0450161	0	0.769231	0.769231	91.5385	4.61538	96.1538	0.769231	96.9231
MG13	98.36	Waipawa	2.68336	-18.51	0.16	5.84	0.93	423.5	3.26	179.141	28.5276	0.0266667	0	0.3367	0.3367	92.2559	4.7138	96.9697	0	96.9697
MG14	104.13	Waipawa	2.45151	-18.92	0.16	3.91	2.26	423.1	2.63	148.669	85.9316	0.039312	0	0.348432	0.348432	94.0767	3.48432	97.561	0	97.561
MG15	109.49	Waipawa	2.3816	-22.75	0.23	4.61	2.56	419.7	3.34	138.024	76.6467	0.0475207	0	0.342466	0.342466	89.3836	5.13699	94.5205	1.71233	96.2329
MG16	115.65	Waipawa	2.86839	-19.87	0.2	5.9	2.18	418.8	3.23	182.663	67.4923	0.0327869
Correlation (r)	δ13COM		0.659251	1	0.25086	0.578836	-0.0512355	-0.346868	0.422684	0.654778	-0.176315	-0.253296	-0.103199	-0.628269	-0.439437	0.703414	-0.543594	0.777298	-0.638321	0.688167
Correlation (r)	TOC		0.747882	0.422684	0.854173	0.849037	0.00749651	-0.611829	1	0.550102	-0.422911	0.328332	-0.121911	-0.808826	-0.55751	0.612256	-0.485157	0.661751	-0.34209	0.693658
Chancet Rocks section
Data source: this study
Additional reference: Hollis, 2003
Notes:
Sample no.	Height	Formation	EA-IRMS		Bulk pyrolysis
	(m)		%COM	δ13COM	S1	S2	S3	Tmax	TOC	HI	OI	PI
			(%)	(‰)	(mg HC/g	(mg HC/g	(mg CO2/g	(°C)	(wt%)	(mg HC/g	(mg CO2/g	(-)
					rock)	rock)	rock)			TOC)	TOC)
CR4	2.905	Amuri Lst	0.121643	-26.3	0	0	0.35	390.4	0.47	0	75
CR20	1.91	Amuri Lst	0.0669688	-27.84	0	0.03	0.38	340.2	0.44	6	87	0
CR19	1.615	Amuri Lst	0.0758088	-26.84	0	0.04	0.36	413	0.63	6	57	0
CR18	1.33	Amuri Lst	0.0285594	-28.16	0	0.03	0.14	413.6	0.08	35	174	0
CR17	1.13	Amuri Lst	0.108312	-23.55	0	0.04	0.5	336.3	0.53	7	94	0
CR16	1	Amuri Lst	0.086907	-26.96	0	0.02	0.42	254.1	0.52	4	81	0
CR15	0.935	Amuri Lst	0.0646757	-26.55	0	0.03	1.19	319	0.87	3	137	0
CR14	0.89	Amuri Lst	0.0347554	-27.73	0	0	0.43	333.3	0.21	0	203
CR13	0.805	Amuri Lst	0.0472836	-26.85	0	0.01	0.21	408.5	0.06	12	367	0
CR12	0.68	WOF?	0.308366	-24.21	0.02	0.17	0.09	408.5	0.25	66	36	0.105263
CR11	0.59	WOF?	0.198274	-24.05	0	0.09	0.09	413.6	0.18	47	51	0
CR10	0.37	WOF?	0.279434	-21.15	0	0.14	0.41	419.4	0.45	31	90	0
CR9	0.17	WOF?	0.266817	-24.23	0	0.16	0.23	408.1	0.41	40	56	0
CR8	0.12	WOF?	0.380612	-22.54	0	0.22	0.22	418.2	0.36	61	60	0
CR7	0.035	WOF?	0.284419	-22.08	0	0.13	0.36	419.3	0.31	43	114	0
CR6	-0.05	Mead Hill	0.153128	-21.47	0	0	0.87	411.8	1.15	0	76
CR5	-0.675	Mead Hill	0.163368	-25.34	0.01	0.01	0.57	373	0.66	2	87	0.5
CR3	-1.305	WOF?	0.0661852	-24.87	0.01	0.02	1.58	353.1	0.61	3	258	0.333333
CR2	-1.34	WOF?	0.158244	-24.43	0.04	0.06	1.33	421.2	0.5	11	264	0.4
CR1	-1.395	WOF?	0.129	-25.47	0.04	0.01	0.53	414	0.74	2	72	0.8
Correlation (r)	δ13COM		0.769745	1	0.0413821	0.577442	0.0753457	0.451288	0.258289	0.421204	-0.296389
Correlation (r)	TOC		-0.0913026	0.258289	0.166465	-0.320666	0.600582	-0.179204	1	-0.536717	-0.281581
Benmore Stream section
Data source: this study
Additional reference:
Notes:
Sample no.	Height	Formation	EA-IRMS		Bulk pyrolysis
	(m)		%COM	δ13COM	S1	S2	S3	Tmax	TOC	HI	OI	PI
			(%)	(‰)	(mg HC/g	(mg HC/g	(mg CO2/g	(°C)	(wt%)	(mg HC/g	(mg CO2/g	(-)
					rock)	rock)	rock)			TOC)	TOC)
Benmore10	3.2	Amuri Lst			0	0	0.45	507.2	0.41	0	110
Benmore9	3	Amuri Lst			0	0	0.56	404	0.44	0	128
Benmore8	2.6	Amuri Lst			0	0	0.43	509.8	0.38	0	115
Benmore7	2.3	Amuri Lst			0	0	0.45	500.4	0.3	0	152
Benmore6	1.9	WOF	1.75	-23.06	0.01	1.75	1.09	423.7	1.43	122	76
Benmore5	1.5	WOF	3.5	-20.91	0.03	5.34	2.53	420.3	2.73	196	93
Benmore4	1	WOF	2.31	-19.16	0.02	3.46	1.74	418.4	1.93	180	90
Benmore3	0.8	WOF	1.74	-20.46	0.01	2.42	1.01	422.2	1.52	160	67
Benmore2	0.7	Mead Hill			0	0.01	0.43	419.2	0.44	2	96
Benmore1	0	Mead Hill			0	0	0.48	407.8	0.42	0	116
Correlation (r)	δ13COM		0.235242	1	0.367715	0.422814	0.313731	-0.87742	0.309179	0.749878	0.34055
Correlation (r)	TOC		0.996836	0.309179	0.987414	0.99414	0.976668	-0.435034	1	0.966065	-0.639355
Mead Stream section
Data source: Hollis et al., 2005, 2014; Andrew, 2010; this study
Additional reference: Strong et al., 1997
Notes: Unreliable values in square brackets (%C_OM, AOM)
Sample no.	Height	Formation	EA-IRMS		Bulk pyrolysis								Palynofacies (%)
	(m)		%COM	δ13COM	S1	S2	S3	Tmax	TOC	HI	OI	PI	Marine			Terrestrial
			(%)	(‰)	(mg HC/g	(mg HC/g	(mg CO2/g	(°C)	(wt%)	(mg HC/g	(mg CO2/g	(-)	AOM	Marine	Total	Degraded	Other	Total	Terrestrial	Total
					rock)	rock)	rock)			TOC)	TOC)			palynomorphs	marine	phytoclasts	phytoclasts	phytoclasts	palynomorphs	Terrestrial
BA-MD26	120.744	Amuri Lst
BA-MD25	118.32	Amuri Lst
MS-J31	118.03	Amuri Lst						Wrong Tmax data!
MS-J30	117.08	Amuri Lst
BA-MD24	116.74	Amuri Lst
MS-J29	116.35	Amuri Lst
MD15-CH066	116.18	Amuri Lst
MD15-CH067	116.06	Amuri Lst	0.24	-25.6	0	0.09	0.17	417.2	0.33	27	51	0	73.8602	1.82371	75.6839	11.5502	12.766	24.3161	0	24.3161
MD15-CH068	115.89	Amuri Lst
MD15-CH069	115.75	Amuri Lst	0.55	-24.63	0	0.14	0.15	417.4	0.47	29	33	0
BA-MD23	115.72	WOF?	1.54	-20.8	0.01	0.71	0.39	422.7	1.23	58	32	0.0138889
MS23	115.63	WOF?
BA-MD22	115.62	WOF?	0.94	-22	0	0.22	0.34	422	0.69	33	50	0
MD15-CH070	115.6	WOF?	2.01	-20.2	0.02	1.51	0.67	424.1	1.62	93	42	0.0130719	20	0	20	71.3333	8.66667	80	0	80
BA-MD21	115.5	WOF?	2.41		0.03	2.15	0.63	426.1	2.14	101	30	0.0137615	[44.8]	0.322581	45.1613	43.2258	11.6129	54.8387	0	54.8387
MS26	115.44	Amuri Lst
MD15-CH071	115.422	Amuri Lst	0.55	-24.1	0	0.1	0.19	415.2	0.31	33	63	0	34.6667	1.33333	36	55.6667	8.33333	64	0	64
MD15-CH072	115.25	Amuri Lst
MD15-CH073	115.031	Amuri Lst
BA-MD20	114.98	Amuri Lst	0.42
MD15-CH074	114.897	Amuri Lst
MD15-CH075	114.62	Amuri Lst
MD15-CH076	114.143	Amuri Lst
MD15-CH077	113.808	Amuri Lst	0.12	-26.6	0	0.05	0.12	433.6	0.12	41	101	0	90.6452	1.93548	91.9355	5.80645	1.6129	7.41935	0.645161	8.06452
MD15-CH078	113.388	Amuri Lst
MD15-CH079	112.968	Amuri Lst
MD15-CH080	112.729	Amuri Lst
MS14	112.53	Amuri Lst
MD15-CH081	112.299	Amuri Lst
MD15-CH082	111.726	Amuri Lst											94.1748	0.970874	95.1456	2.26537	2.589	4.85437	0	4.85437
MD15-CH084	111.64	Amuri Lst
MS15	111.53	Amuri Lst
BA-MD19	111.28	Amuri Lst	0.18	-25.8	0.01	0.02	0.27	407.6	0.4	5	68	0.333333
BA-MD18C	111.18	Amuri Lst
BA-MD18H	111.18	Amuri Lst	0.31
MD15-CH083	111.058	Amuri Lst
MD15-CH085	110.876	Amuri Lst	0.34	-26.8	0	0.08	0.29	407.2	0.18	41	156	0
BA-MD17	110.67	Waipawa	2.64	-21.53	0.03	2.75	1.16	425.6	1.89	146	61	0.0107914
MD15-CH086	110.655	Waipawa	0.71	-24.6	0	0.08	1.17	413.9	0.98	8	119	0	80.6962	1.58228	82.2785	11.3924	6.32911	17.7215	0	17.7215
BA-MD16	110.54	Waipawa	1.44	-21.53	0.01	1.58	0.67	423.4	1.5	105	44	0.00628931
BA-MD15	110.48	Waipawa	1.83	-21.32	0.01	3.2	0.47	422.1	1.7	188	28	0.00311526
MS12	110.24	Waipawa
BA-MD14	110.08	Waipawa	2.83	-21.11	0.02	3.15	0.72	420.5	1.95	162	37	0.00630915	8.03324	0.554017	8.58726	83.1025	8.31025	91.4127	0	91.4127
BA-MD13	109.9	Waipawa	0.32	-21.9	0	0.41	0.24	422.2	0.57	71	43	0
MS11	109.7	Waipawa
BA-MD12	109.24	Waipawa	5.5	-21.19	0.06	7.77	2.36	415.4	4.34	179	54	0.00766284	2.22222	0	2.22222	93.3333	4.44444	97.7778	0	97.7778
BA-MD10	108.84	Waipawa	4.35	-19.12	0.04	4.67	1.66	408.7	3.04	153	54	0.00849257
BA-MD09	108.72	Waipawa	1.54	-18.68	0.05	3.69	0.72	419.5	1.72	215	42	0.013369
MD15-CH087	108.68	Waipawa	2.57	-19.5	0.05	5.97	0.55	415.5	2.26	264	24	0.00830565
MD15-CH088	108.505	Waipawa	1.78	-22	0	1.23	0.49	420.7	1.29	95	38	0	30.4207	0.647249	31.068	56.3107	12.6214	68.932	0	68.932
BA-MD08	108.46	Waipawa	3.24	-18.88	0.03	9.28	1.44	415	3.81	244	38	0.00322234
BA-MD11	108.36	Waipawa	3.63	-21.21	0.06	8.4	1.02	411.6	3.35	251	31	0.0070922	3.66972	0	3.66972	89.2966	7.03364	96.3303	0	96.3303
MD15-CH089	108.355	Waipawa	0.87	-23.7	0	0.21	0.52	416	0.64	33	81	0
MS1A	108.3	Waipawa
BA-MD07	108.28	Waipawa	1.61	-21.09	0.01	1.67	0.69	419.5	1.6	104	43	0.00595238
MD15-CH090	108.165	Mead Hill											65.9016	2.62295	68.5246	24.918	6.55738	31.4754	0	31.4754
BA-MD06	108.14	Mead Hill	0.69	-23.5	0.01	0.4	0.44	419.7	0.94	42	46	0.0243902
MD15-CH091	108	Mead Hill
BA-MD05	107.99	Mead Hill	[3.99]
MD15-CH092	107.82	Mead Hill
MS18	107.8	Mead Hill
MD15-CH093	107.34	Mead Hill
BA-MD03	107.33	Mead Hill	0.13	-24.1	0	0.07	0.21	423.7	0.51	13	40	0
BA-MD02	107.08	Mead Hill
MD-F12	107.08	Mead Hill
MD15-CH094	106.94	Mead Hill	0.34	-26.6	0	0.04	0.25	407.1	0.29	15	86	0	65.6863	3.59477	69.281	22.549	8.16993	30.719	0	30.719
BA-MD00	106.8	Mead Hill
MD15-CH095	106.64	Mead Hill
MD-F13	106.57	Mead Hill
MD15-CH096	106.325	Mead Hill
MD15-CH097	106.16	Mead Hill
MD15-CH098	105.86	Mead Hill											93.1548	2.97619	96.131	0.297619	3.57143	3.86905	0	3.86905
MD15-CH099	105.435	Mead Hill
MD15-CH100	105.17	Mead Hill
MD15-CH101	104.78	Mead Hill
Correlation (r)	δ13COM		0.711712	1	0.673156	0.680475	0.543928	0.163182	0.749469	0.790339	-0.667816		-0.906602	-0.917596	-0.913191	0.905473	0.14344	0.913222	-0.469	0.913191
Correlation (r)	TOC		0.959058	0.749469	0.858468	0.939584	0.87396	-0.102766	1	0.8321	-0.422028		-0.795836	-0.75448	-0.786443	0.805561	-0.148594	0.786122	-0.340661	0.786443
Mid-Waipara River section
Data source: Hollis et al., 2014
Additional reference:
Notes: Palynofacies and pyrolysis, this study
Sample no.	Height	Formation	EA-IRMS		Bulk pyrolysis								Palynofacies (%)
	(m)		%COM	δ13COM	S1	S2	S3	Tmax	TOC	HI	OI	PI	Marine			Terrestrial
			(%)	(‰)	(mg HC/g	(mg HC/g	(mg CO2/g	(°C)	(wt%)	(mg HC/g	(mg CO2/g	(-)	AOM	Marine	Total	Degraded	Other	Total	Terrestrial	Total
					rock)	rock)	rock)			TOC)	TOC)			palynomorphs	marine	phytoclasts	phytoclasts	phytoclasts	palynomorphs	Terrestrial
M34/f678	132.535	Ashley Mst?	0.4	-32									83.1169	6.81818	89.9351	4.22078	4.87013	9.09091	0.974026	10.0649
M34/f677	132.065	Ashley Mst?	0.5	-32.4	0	0.05	0.18	308	0.18	26	100	0	1.5748	12.5984	14.1732	50.9186	33.0709	83.9895	1.83727	85.8268
M34/f676	131.975	Waipara Gst	0.2	-27.7	0.02	0.12	0.28	414.3	0.29	39	94	0.142857	46.13	19.6718	65.8019	7.73994	17.0279	24.7678	9.43034	34.1981
M34/f675	131.105	Waipara Gst	0.3	-26	0.01	0.11	0.59	415.5	0.38	29	158	0.0833333	0	22.4551	22.4551	17.6647	32.9341	50.5988	26.9461	77.5449
M34/f674	130.655	Waipawa organofacies	0.7	-17.9	0.02	0.32	1.87	392.6	1.1	29	169	0.0588235	0.321543	23.1897	23.5113	24.1158	19.6141	43.7299	32.7588	76.4887
M34/f672	130.005	Waipawa organofacies	1.8	-19.2	0.04	0.66	1.67	404.2	1.31	51	128	0.0571429	0	22.1122	22.1122	19.802	23.7624	43.5644	34.3234	77.8878
M34/f673	129.525	Waipawa organofacies	0.9	-20.3	0.03	0.64	1.94	403.3	1.53	41	127	0.0447761	2.9316	19.6873	22.6189	28.3388	14.9837	43.3225	34.0586	77.3811
M34/f671	129.255	Waipawa organofacies	1.1	-19.1	0.09	1.24	1.97	409.3	1.74	71	113	0.0676692	0	20	20	23	32	55	25	80
M34/f670	129.055	Waipawa organofacies	1.5	-20.2	0.08	1.64	2.55	409.4	2.21	74	116	0.0465116	0	17.5294	17.5294	16.7647	17.9412	34.7059	47.7647	82.4706
M34/f669	128.375	Waipawa organofacies	1.6	-17.6	0.08	1.18	2.42	404.5	2.02	58	120	0.0634921	0	24.0132	24.0132	19.0789	23.3553	42.4342	33.5526	75.9868
M34/f668	126.385	Waipawa organofacies	0.5	-21.9	0.01	0.2	0.9	408	0.7	28	128	0.047619	7.34824	27.7412	35.0895	18.8498	14.0575	32.9073	32.0032	64.9105
M34/f667	125.235	Waipawa organofacies	0.5	-21	0.02	0.26	0.83	410	0.7	36	117	0.0714286	0.319489	26.5176	26.8371	10.5431	28.115	38.6581	34.5048	73.1629
M34/f666	123.515	Waipawa organofacies	0.4	-23.6	0.02	0.21	0.79	420.1	0.65	32	121	0.0869565	0	29.6254	29.6254	11.0749	19.8697	30.9446	39.43	70.3746
M34/f663	122.295	Waipara Gst	0.2	-26									1.46199	15.1754	16.6374	34.2105	36.8421	71.0526	12.3099	83.3626
M34/f665	121.145	Waipara Gst	0.4	-25.8	0.07	0.15	0.5	414.4	0.43	34	115	0.318182	0	23.6066	23.6066	22.9508	27.541	50.4918	25.9016	76.3934
M34/f664	119.625	Waipara Gst	0.4	-26.1									43.3225	6.77199	50.0945	25.4072	13.0293	38.4365	11.4691	49.9055
M34/f662	117.925	Waipara Gst	0.2	-29.4									0.649351	28.7143	29.3636	21.1039	22.4026	43.5065	27.1299	70.6364
M34/f661	116.405	Waipara Gst	0.1	-28.7									8.02469	33.5185	41.5432	8.95062	16.9753	25.9259	32.5309	58.4568
M34/f660	114.885	Waipara Gst	0.2	-29									2.13904	28.5615	30.7005	17.3797	28.877	46.2567	23.0428	69.2995
M34/f659	112.175	Waipara Gst	0.34	-26.5									2.28758	28.7582	31.0458	9.47712	20.5882	30.0654	39.1634	69.2288
Correlation (r)	δ13COM		0.732846	1	0.503785	0.631408	0.852647	0.525806	0.794745	0.533803	0.419129	-0.202301	-0.451124	0.191252	-0.462046	-0.0326906	0.0356948	-0.00344856	0.664613	0.46169
Correlation (r)	TOC		1	0.732846	0.629922	0.819043	0.835205	0.0557321	0.85674	0.766103	0.0121571	-0.333445	-0.250596	-0.122128	-0.348034	0.103528	-0.0163407	0.0591084	0.422027	0.347595
Galleon-1 drillhole
Data source: Schioler, 2011
Additional reference:
Notes:
Sample no.	Height	Formation											Palynofacies (%)
	(m)												Marine			Terrestrial
													AOM	Marine	Total	Degraded	Other	Total	Terrestrial	Total
														palynomorphs	marine	phytoclasts	phytoclasts	phytoclasts	palynomorphs	Terrestrial
L23951	2402	Kurunui											5.16129	11.6129	16.7742	50.3226	28.7097	79.0323	1.93548	80.9677
L25319	2422.5	Kurunui											63.6364	3.57143	67.2078	8.76623	21.1039	29.8701	2.5974	32.4675
L14732	2442.5	Kurunui											73.1148	6.88525	80	4.59016	9.18033	13.7705	5.2459	19.0164
L25320	2457.5	Kurunui											59.6026	0.993377	60.596	14.9007	19.8675	34.7682	3.31126	38.0795
L23952	2474.6	Kurunui											19.9357	1.60772	21.5434	55.3055	13.5048	68.8103	6.43087	75.2412
L25321	2487.5	Kurunui											24.918	4.59016	29.5082	28.8525	36.7213	65.5738	4.59016	70.1639
L23953	2502	Kurunui											22.8013	9.12052	31.9218	39.0879	20.5212	59.6091	5.86319	65.4723
L23954	2506.5	Tartan (Waipawa)											0.327869	0	0.327869	91.8033	5.90164	97.7049	0.983607	98.6885
BP25793	2509.5	Tartan (Waipawa)											2.24359	2.88462	5.12821	89.4231	4.48718	93.9103	0.961538	94.8718
L23955	2512.4	Tartan (Waipawa)											0	0	0	88.3495	9.70874	98.0583	0.970874	99.0291
L23956	2519.5	Tartan (Waipawa)											1.5873	10.4762	12.0635	64.4444	16.5079	80.9524	4.12698	85.0794
L14731	2532.5	Katiki (Whangai)											35.9736	12.8713	48.8449	25.4125	19.4719	44.8845	4.9505	49.835
L23957	2559.2	Katiki (Whangai)											6.05096	21.0191	27.0701	44.2675	21.0191	65.2866	6.05096	71.3376
L14730	2574.5	Katiki (Whangai)											20.3947	12.8289	33.2237	19.7368	36.1842	55.9211	9.86842	65.7895
L23958	2595.9	Katiki (Whangai)											13.871	28.0645	41.9355	26.7742	23.5484	50.3226	5.16129	55.4839
L14729	2604.5	Katiki (Whangai)											24.1042	26.0586	50.1629	11.7264	20.5212	32.2476	16.9381	49.1857
L14728	2619.5	Katiki (Whangai)											4.60526	27.9605	32.5658	12.8289	36.8421	49.6711	17.1053	66.7763
L14727	2631.5	Katiki (Whangai)											3.65449	10.299	13.9535	13.289	52.8239	66.113	19.2691	85.3821
L14726	2640.5	Katiki (Whangai)											16.7213	5.90164	22.623	23.6066	40.9836	64.5902	12.1311	76.7213
L14725	2649.5	Katiki (Whangai)											6.14887	8.41424	14.5631	18.7702	53.0744	71.8447	11.6505	83.4951
L14724	2661.5	Katiki (Whangai)											3.31126	6.29139	9.60265	30.1325	48.6755	78.8079	10.2649	89.0728
BP25969	2673.5	Katiki (Whangai)											8.49673	36.6013	45.098	20.915	30.3922	51.3072	2.28758	53.5948
L14723	2685.5	Katiki (Whangai)											11.4754	6.55738	18.0328	42.623	31.1475	73.7705	8.19672	81.9672
BP25788	2690	Katiki (Whangai)											6.20915	29.7386	35.9477	20.2614	30.3922	50.6536	11.7647	62.4183
BP25787	2692.5	Katiki (Whangai)											1.22249	13.4474	14.6699	31.0513	44.4988	75.5501	8.80196	84.3521
BP25957	2694.5	Katiki (Whangai)											12.8617	4.50161	17.3633	64.6302	16.0772	80.7074	1.28617	81.9936
BP25958	2706.5	Katiki (Whangai)											38.4127	16.1905	54.6032	17.4603	21.2698	38.7302	6.34921	45.0794
BP25959	2718.5	Katiki (Whangai)											24.1722	17.5497	41.7219	26.8212	23.5099	50.3311	7.61589	57.947
BP25960	2730.5	Katiki (Whangai)											10.8911	30.6931	41.5842	6.93069	39.1089	46.0396	12.3762	58.4158
BP25900	2735	Katiki (Whangai)											2.31788	10.2649	12.5828	44.3709	35.0993	79.4702	7.28477	86.755
BP25899	2744.7	Katiki (Whangai)											0.980392	10.4575	11.4379	63.0719	18.9542	82.0261	6.53595	88.5621
Toroa-1 drillhole
Data source: Schiøler et al., 2010, and GNS Science unpublished results
Additional reference: Cook et al., 1999
Notes: Tartan interval of Cook et al., 1999, revised to Waipawa Formation by Schiøler et al., 2010
Sample type	Depth	Formation	EA-IRMS		Bulk pyrolysis								Palynofacies (%)
	(mbkb)		%COM	δ13COM	S1	S2	S3	Tmax	TOC	HI	OI	PI	Marine			Terrestrial
			(%)	(‰)	(mg HC/g	(mg HC/g	(mg CO2/g	(°C)	(wt%)	(mg HC/g	(mg CO2/g	(-)	AOM	Marine	Total	Degraded	Other	Total	Terrestrial	Total
					rock)	rock)	rock)			TOC)	TOC)			palynomorphs	marine	phytoclasts	phytoclasts	phytoclasts	palynomorphs	Terrestrial
ctgs	1962	Laing	0.5	-27.3
ctgs	2017	Laing	0.35	-26.9
ctgs	2072	Laing	0.65	-26.7
swc	2078.6	Laing	0.1	-26.2									4.65116	5.98007	10.6312	46.5116	37.5415	84.0532	5.31561	89.3688
ctgs	2118	Laing	0.95	-26
swc	2124.4	Laing	0.1	-26.6									15.3595	2.94118	18.3007	42.4837	31.6993	74.183	7.51634	81.6993
	2151	Top Tartan
swc	2159.7	Tartan	0.2	-26.2	0.06	0.41	0.47	410	0.27	151.85	174.07	0.12766	34.7682	0.331126	35.0993	52.3179	10.9272	63.245	1.65563	64.9007
swc	2162.2	Tartan	7.2	-21	0.67	13.16	1.53	399	6.32	208	24	0.0484454	22.0779	0.324675	22.4026	70.1299	4.22078	74.3506	3.24675	77.5974
	2173	Base Tartan
swc	2206.6	Wickliffe	1.6	-25.9	0.1	1.54	0.4	411	1.41	109	28	0.0609756	9.83607	16.0656	25.9016	49.8361	13.7705	63.6066	10.4918	74.0984
swc	2232.9	Wickliffe	0.9	-27	0.12	0.9	0.32	414	0.69	130.43	46.38	0.117647	46.3259	4.15335	50.4792	29.393	11.1821	40.5751	8.94569	49.5208
swc	2235.3	Wickliffe	0.5	-26.8	0.05	0.35	0.34	413	0.37	94.59	91.89	0.125	7.46753	5.84416	13.3117	43.8312	32.7922	76.6234	10.0649	86.6883
ctgs	2246	Wickliffe	1.4	-24.5
swc	2259.7	Wickliffe	1.9	-25.5	0.12	1.71	0.54	415	1.79	96	30	0.0655738	1.59236	4.4586	6.05096	78.6624	9.87261	88.535	5.41401	93.949
ctgs	2346	Wickliffe	0.23	-26
ctgs	2383	Wickliffe	0.4	-26.3
ctgs	2438	Wickliffe	0.26	-27.4
Correlation (r)	δ13COM		0.922546	1	0.969786	0.982295	0.992509	-0.92083	0.984531	0.805137	-0.387884	-0.716933	-0.0325653	-0.302525	-0.139322	0.656354	-0.52776	0.239504	-0.489021	0.139322
Correlation (r)	TOC		0.999272	0.984531	0.982082	0.988187	0.974617	-0.879209	1	0.761308	-0.528598	-0.758499	-0.102291	-0.280337	-0.214994	0.580263	-0.560967	0.297863	-0.389692	0.214994
Pakaha-1 drillhole
Data source: Schiøler et al., 2010, and GNS Science unpublished results
Additional reference: Cook et al., 1999
Notes: Tartan interval of Cook et al., 1999, revised to Waipawa Formation by Schiøler et al., 2010
Sample type	Depth	Formation	EA-IRMS		Bulk pyrolysis								Palynofacies (%)
	(mbkb)		%COM	δ13COM	S1	S2	S3	Tmax	TOC	HI	OI	PI	Marine			Terrestrial
			(%)	(‰)	(mg HC/g	(mg HC/g	(mg CO2/g	(°C)	(wt%)	(mg HC/g	(mg CO2/g	(-)	AOM	Marine	Total	Degraded	Other	Total	Terrestrial	Total
					rock)	rock)	rock)			TOC)	TOC)			palynomorphs	marine	phytoclasts	phytoclasts	phytoclasts	palynomorphs	Terrestrial
swc	2252.47	Laing	0.4	-27.9
ctgs	2377	Laing	1.9	-23.6
swc	2473.45	Laing	0.4	-27.7	0.06	0.71	0.62	432	0.39	182	159	0.0779221	10.4918	6.55738	17.0492	54.7541	23.2787	78.0328	4.91803	82.9508
ctgs	2478	Laing	1.5	-25.5
ctgs	2496	Laing	0.7	-26.4
swc	2504.85	Laing	1.1	-26.4	0.1	0.89	0.37	414	0.8	111.25	46.25	0.10101	68.6469	5.61056	74.2574	12.5413	8.91089	21.4521	4.29043	25.7426
	2515	Top Tartan
ctgs	2551	Tartan	6.5	-19.3									11.8211	1.91693	13.738	78.5942	4.79233	83.3866	2.8754	86.262
ctgs	2560	Tartan	5.9	-19.7
swc	2575.56	Tartan	5.3	-20.7	0.68	9.82	0.79	413	4.85	202	16	0.0647619	18.543	11.2583	29.8013	47.6821	14.9007	62.5828	7.61589	70.1987
	2588	Base Tartan
swc	2638	Wickliffe	1.5	-25.9	0.23	4.69	0.43	429	1.22	384.43	35.25	0.046748	52.1595	0.996678	53.1561	34.2193	8.9701	43.1894	3.65449	46.8439
swc	2657.86	Wickliffe	1.6	-27	0.24	2.11	0.26	420	1.49	142	17	0.102128
ctgs	2706	Wickliffe	1.4	-26.1
ctgs	2761	Wickliffe	0.9	-26.8
ctgs	2807	Wickliffe	1.2	-25.8
swc	2837.69	Wickliffe	1.5	-26	0.29	2.54	0.3	423	1.1	230.91	27.27	0.102473
Correlation (r)	δ13COM		0.973913	1	0.95289	0.953491	0.667282	-0.604324	0.968732	0.11079	-0.48795	-0.399175	-0.469384	0.106631	-0.46652	0.624641	-0.491837	0.459637	0.118296	0.46652
Correlation (r)	TOC		0.996957	0.968732	0.97024	0.945173	0.643751	-0.605782	1	0.0231115	-0.49643	-0.346071	-0.350475	0.715901	-0.261902	0.293942	-0.0558073	0.207505	0.893139	0.261902
Kawau-1A drillhole
Data source: Schiøler et al., 2010, and GNS Science unpublished results
Additional reference: Cook et al., 1999
Notes: Tartan interval of Cook et al., 1999, revised to Waipawa Formation by Schiøler et al., 2010
Sample type	Depth	Formation	EA-IRMS		Bulk pyrolysis								Palynofacies (%)
	(mbkb)		%COM	δ13COM	S1	S2	S3	Tmax	TOC	HI	OI	PI	Marine			Terrestrial
			(%)	(‰)	(mg HC/g	(mg HC/g	(mg CO2/g	(°C)	(wt%)	(mg HC/g	(mg CO2/g	(-)	AOM	Marine	Total	Degraded	Other	Total	Terrestrial	Total
					rock)	rock)	rock)			TOC)	TOC)			palynomorphs	marine	phytoclasts	phytoclasts	phytoclasts	palynomorphs	Terrestrial
ctgs	2034	Laing	0.2	-27
ctgs	2081	Laing	0.3	-27.3
swc	2106.8	Laing	1	-27.9	0.43	2.75	0.29	417	1.01	272.28	28.71	0.13522	10.6667	40.6667	51.3333	35	12.3333	47.3333	1.33333	48.6667
ctgs	2145	Laing	1.6	-26.4
swc	2180.2	Laing	0.8	-26.6	0.33	1.83	0.27	414	0.95	192.63	28.42	0.152778	48.1728	20.2658	68.4385	22.9236	7.97342	30.897	0.664452	31.5615
ctgs	2182	Laing	0.9	-26.3
swc	2193	Laing	0.4	-28.5	0.24	2.66	0.41	427	0.86	309.3	47.67	0.0827586	68.3333	14	82.3333	4.66667	12	16.6667	1	17.6667
swc	2200.7	Laing	0.7	-25.6	0.22	1.33	0.33	407	0.6	222	55	0.141935	29.8361	26.8852	56.7213	31.1475	11.8033	42.9508	0.327869	43.2787
swc	2217.7	Laing	0.4	-24.5	0.08	0.47	0.26	407	0.29	162.07	89.66	0.145455	20.915	43.4641	64.3791	21.8954	13.0719	34.9673	0.653595	35.6209
	2230	Top Tartan
ctgs	2237	Tartan	5	-21.3
swc	2240.3	Tartan	9.3	-18.2	1.13	15.58	2.29	404	8.65	180	26	0.0676242	2.79503	0.310559	3.10559	94.0994	2.17391	96.2733	0.621118	96.8944
ctgs	2246	Tartan	7.6	-19.6
ctgs	2255	Tartan	10.8	-17.7
swc	2262.8	Tartan	4.7	-21.4	0.54	5.84	1.01	409	3.73	157	27	0.0846395	4.4586	5.09554	9.55414	79.6178	7.32484	86.9427	3.50318	90.4459
ctgs	2264	Tartan	11	-17.4
ctgs	2273	Tartan	7.9	-18.4
ctgs	2282	Tartan	3.8	-20.2
ctgs	2292	Tartan	3.5	-20.4
	2300	Base Tartan (revised here)
swc	2301.2	Wickliffe	1.2	-27.3	0.07	0.32	0.3	397	0.23	139.13	130.43	0.179487	9.21053	11.8421	21.0526	41.7763	25.9868	67.7632	11.1842	78.9474
ctgs	2302	Wickliffe	1.7	-26
ctgs	2357	Wickliffe	1.9	-25.1
swc	2375.6	Wickliffe	1.3	-27.6	0.13	1.98	0.24	413	0.62	319.35	38.71	0.0616114	43.3544	10.443	53.7975	34.4937	6.01266	40.5063	5.6962	46.2025
swc	2386.6	Wickliffe	1.3	-27.2	0.09	1.99	0.32	409	0.71	280.28	45.07	0.0432692	28.5714	4.31894	32.8904	53.8206	11.2957	65.1163	1.99336	67.1096
ctgs	2410	Wickliffe	1.2	-26.9
ctgs	2456	Wickliffe	1	-26.6									7.79221	44.8052	52.5974	28.5714	14.9351	43.5065	3.8961	47.4026
ctgs	2511	Wickliffe	1.1	-27.6
Correlation (r)	δ13COM		0.927201	1	0.812309	0.840144	0.897596	-0.435021	0.894011	-0.57362	-0.26184	-0.229385	-0.555836	-0.348596	-0.692538	0.822708	-0.529033	0.751913	-0.240466	0.692538
Correlation (r)	TOC		0.986225	0.894011	0.958784	0.992165	0.994086	-0.219404	1	-0.296447	-0.433842	-0.402003	-0.476041	-0.503691	-0.67163	0.821381	-0.599514	0.730093	-0.228974	0.67163
Hoiho-1C drillhole
Data source: Schiøler et al., 2010, and GNS Science unpublished results
Additional reference: Cook et al., 1999
Notes: Tartan interval of Cook et al., 1999, revised to Waipawa Formation by Schiøler et al., 2010
Sample type	Depth	Formation	EA-IRMS		Bulk pyrolysis								Palynofacies (%)
	(mbkb)		%COM	δ13COM	S1	S2	S3	Tmax	TOC	HI	OI	PI	Marine			Terrestrial
			(%)	(‰)	(mg HC/g	(mg HC/g	(mg CO2/g	(°C)	(wt%)	(mg HC/g	(mg CO2/g	(-)	AOM	Marine	Total	Degraded	Other	Total	Terrestrial	Total
					rock)	rock)	rock)			TOC)	TOC)			palynomorphs	marine	phytoclasts	phytoclasts	phytoclasts	palynomorphs	Terrestrial
swc	1523.9	Laing	0.6	-27.1	0.12	0.96	0.31	405	0.46	208.7	67.39	0.111111	6.41026	72.1154	78.5256	11.5385	6.41026	17.9487	3.52564	21.4744
swc	1535.5	Laing	1.5	-26.6	0.2	3.97	0.4	399	1.2	330.83	33.33	0.0479616	18.4211	51.3158	69.7368	26.9737	1.97368	28.9474	1.31579	30.2632
swc	1554.4	Laing	0.5	-26.3	0.11	2.12	0.35	421	0.51	415.69	68.63	0.0493274	61.6613	19.4888	81.1502	14.0575	4.47284	18.5304	0.319489	18.8498
swc	1557.5	Laing	3	-25	0.3	4.44	1.23	405	2.84	156	43	0.0632911	4.59016	11.8033	16.3934	77.377	2.62295	80	3.60656	83.6066
	1570	Top Tartan
swc	1577.6	Tartan	17.1	-15.8	1.54	30.91	7.38	404	15.15	204	49	0.0474576	0.643087	2.89389	3.53698	94.8553	0.321543	95.1768	1.28617	96.463
swc	1578.8	Tartan	8	-19.7	0.75	19.67	2.31	404	7.35	268	31	0.0367287	2.96053	5.26316	8.22368	86.8421	1.64474	88.4868	3.28947	91.7763
	1592	Base Tartan
swc	1613.8	Wickliffe	1.3	-26.6	0.11	2.07	0.41	411	0.94	220.21	43.62	0.0504587	4.57516	46.732	51.3072	25.1634	11.1111	36.2745	12.4183	48.6928
swc	1645.8	Wickliffe	0.7	-26.4	0.11	1.62	0.35	415	0.54	300	64.81	0.0635838	7.14286	68.8312	75.974	17.5325	2.92208	20.4545	3.57143	24.026
Correlation (r)	δ13COM		0.980911	1	0.980976	0.994866	0.943269	-0.331071	0.984935	-0.284646	-0.353284	-0.442472	-0.348882	-0.73086	-0.82905	0.866741	-0.582359	0.855707	-0.268442	0.82905
Correlation (r)	TOC		0.999573	0.984935	0.998883	0.98725	0.983872	-0.374075	1	-0.342697	-0.323324	-0.381785	-0.374663	-0.685031	-0.805869	0.841535	-0.558924	0.831486	-0.258314	0.805869
IODP Site 1172
Data source: Hollis et al., 2014; this study
Additional reference: Bijl et al., 2009
Notes: Age model revised herein
Sample no.	Depth	Age	EA-IRMS		Bulk pyrolysis								Palynofacies (%)
	(mbsf)	(Myr)	%COM	δ13COM	S1	S2	S3	Tmax	TOC	HI	OI	PI	Marine			Terrestrial
			(%)	(‰)	(mg HC/g	(mg HC/g	(mg CO2/g	(°C)	(wt%)	(mg HC/g	(mg CO2/g	(-)	AOM	Marine	Total	Degraded	Other	Total	Terrestrial	Total
					rock)	rock)	rock)			TOC)	TOC)			palynomorphs	marine	phytoclasts	phytoclasts	phytoclasts	palynomorphs	Terrestrial
16R-4 135-137cm	621.25	58.1717	0.6	-25.5	0.05	0.24	0.56	411.7	0.55	45	102	0.18
16R-5 5-7cm	621.45	58.1787	0.5	-24.6	0.05	0.25	0.57	410.6	0.57	44	100	0.17	30.9764	8.75421	39.7306	8.75421	47.138	55.8923	4.3771	60.2694
16R-5 25-27cm	621.65	58.1857	0.9	-21.5	0.07	0.44	0.96	403.2	0.96	46	100	0.14
17R-1 6-8cm	625.06	58.3051	0.5	-24.5	0.06	0.25	0.53	413.8	0.52	48	101	0.18
17R-1 55-57cm	625.55	58.3223	4.5	-18.5	0.22	2.42	2	386.5	2.86	84	70	0.08
17R-1 105-107cm	626.05	58.3398	5.1	-18.3	0.27	3.32	2.21	391.6	3.52	94	63	0.08	4.20712	3.23625	7.44337	82.5243	9.38511	91.9094	0.647249	92.5566
17R-2 5-7cm rpt	626.55	58.3573	9.6	-17.9	0.55	8.82	3.21	389.7	6.88	128	47	0.06
17R-2 55-57cm	627.05	58.3748	7.7	-18	0.17	1.67	3.32	382.33	4.44	38	75	0.09
17R-2 106-108cm	627.56	58.3926	4.9	-18.8	0.26	3.19	2.02	382.103	3.23	99	63	0.07
17R-3 5-7cm	628.05	58.4098	3.8	-18.8	0.11	1.22	1.83	394.017	2.4	51	76	0.09
17R-3 52-54cm	628.525	58.4264	2.1	-20.3	0.07	0.45	0.8	397.841	1.01	45	79	0.14
17R-3 105-107cm	629.05	58.4448	3.4	-19.1	0.09	0.73	1.46	399.253	1.8	41	81	0.11
17R-4 5-7cm	629.55	58.4623	3.1	-19.4	0.1	0.72	1.18	391.987	1.47	49	80	0.12
17R-4 55-57cm	630.05	58.4798	3.7	-20.5	0.11	1	2.09	383.18	2.21	45	95	0.1	19.3846	2.15385	21.5385	61.8462	15.0769	76.9231	1.53846	78.4615
17R-4 105-107cm	630.55	58.4973	2.9	-20.3	0.11	1.5	1.87	398.043	2.34	64	80	0.07
17R-5 5-7cm	631.05	58.5148	3.8	-21.1	0.12	0.97	1.89	395.5	2.15	45	88	0.11
17R-5 55-57cm	631.55	58.5323	1.2	-21.9	0.12	1.66	1.87	396.409	2.46	67	76	0.07
17R-5 105-107cm	632.05	58.5498	1.2	-22.1	0.07	0.45	1.04	401.632	1.11	41	93	0.14
17R-6 5-7cm	632.55	58.5673	1	-22	0.07	0.46	0.95	398.995	1.03	44	92	0.13
17R-6 55-57cm	633.05	58.5848	1.5	-21.9	0.06	0.4	0.69	410.238	0.9	44	76	0.14
17R-6 105-107cm	633.55	58.6023	1.4	-21.3	0.07	0.52	0.91	401.368	1.1	47	83	0.12
17R-7 5-7cm	634.05	58.6198	4.2	-18.6	0.1	0.64	1.25	392.8	1.22	53	103	0.14
17R-7 55-57cm	634.55	58.6373	3.5	-19	0.17	1.8	2.13	391.7	2.79	65	76	0.08
17R-CC 5-7cm	634.58	58.6383	3	-19.2	0.1	0.7	1.36	397.4	1.55	45	87	0.12	2.23642	5.43131	7.66773	71.885	16.6134	88.4984	3.83387	92.3323
18R-1 8-10cm	634.68	58.6418	2.3	-19.7	0.1	0.95	1.39	397	1.74	55	80	0.1
18R-1 62-64cm	635.22	58.6607	2.7	-19.5	0.1	0.87	1.51	390.5	1.87	46	81	0.11
18R-1 105-106cm	635.65	58.6758	2.9	-20.3	0.09	0.53	0.96	391.5	1.24	43	77	0.14
18R-2 5-7cm	636.15	58.6933	1.5	-20.8	0.14	1.5	1.59	391.3	2.21	68	72	0.09
18R-2 55-57cm	636.65	58.7108	2	-20.2	0.1	0.73	1.26	387.2	1.52	48	83	0.13
18R-2 106-108cm	637.16	58.7286	1.4	-21.3	0.08	0.52	0.82	391.4	1.1	47	75	0.13
18R-3 3-5cm	637.63	58.7451	0.9	-23.3	0.06	0.32	0.63	401.4	0.75	43	84	0.16
18R-3 55-57cm	638.15	58.7633	0.7	-23.3	0.06	0.28	0.58	401.8	0.58	49	101	0.17
18R-3 105-107cm	638.65	58.7808	0.6	-24.3	0.06	0.25	0.47	403.5	0.51	49	91	0.19
18R-4 6-8cm	639.16	58.7986	0.6	-24.2	0.06	0.25	0.46	411.2	0.49	51	93	0.2
18R-4 55-57cm	639.65	58.8158	0.6	-23.8	0.06	0.26	0.45	398.9	0.59	44	76	0.19
18R-4 105-107cm	640.15	58.8333	0.6	-25.3	0.06	0.24	0.48	403.3	0.52	47	92	0.2
18R-5 7-9cm	640.67	58.8515	0.6	-25.3	0.06	0.24	0.47	413.5	0.51	46	92	0.2
18R-5 55-57cm	641.15	58.8683	0.6	-25.7	0.06	0.25	0.48	420.8	0.54	46	90	0.2
18R-6 7-9cm	642.17	58.904	0.6	-25.5	0.06	0.25	0.49	420.9	0.55	45	89	0.18
18R-6 53-55cm	642.63	58.9201	0.6	-25.6	0.06	0.25	0.56	414.2	0.57	44	98	0.19	32.6733	11.5512	44.2244	12.2112	38.6139	50.8251	4.9505	55.7756
Correlation (r)	δ13COM		0.806604	1	0.591254	0.539529	0.804917	-0.85253	0.733919	0.449078	-0.630285	-0.874438	-0.954915	-0.883576	-0.989113	0.988906	-0.94212	0.996701	-0.78633	0.989113
Correlation (r)	TOC		0.927291	0.733919	0.924563	0.910515	0.947833	-0.662724	1	0.76412	-0.769825	-0.812097	-0.748538	-0.841029	-0.808734	0.881793	-0.887867	0.846585	-0.958622	0.808734
