# Supplementary material for: Late Paleocene CO 2 drawdown, climatic cooling, and terrestrial denudation in the southwest Pacific
Source: Copernicus journal article supplement (doi:10.5194/cp-2021-122), 2021-09-17
Supplement: Supplementary file 1 [file cp-2021-122-supplement.zip › Table_S3_Density_fractions.xlsx]

## Sheet: Table S3
Table S3. Carbon stable isotope and palynofacies data for Taylor White section bulk samples and density fractions.
Sample details					TOC	δ13COM		Palynofacies
Sample no.	Depth	Formation	Facies1	Density	(wt%)	≥6 μm	<6 μm	AOM	Marine	Terrestrial	Degraded	Other	Unknown
	(m)			fraction2		(‰)	(‰)		palynomorphs	palynomorphs	phytoclasts	phytoclasts
								(%)	(%)	(%)	(%)	(%)	(%)
TW-57	147.5	Wanstead		Bulk OM	0.13	-25.43		4	9	8	22	47	9
TW-54	143	Wanstead		Bulk OM	0.19	-26.8		4.06977	7.55814	1.74419	41.2791	44.186	1.16279
TW-53	141.5	Wanstead		Bulk OM	0.27	-26.6		16	2	1	5	72	4
TW-52	140	Waipawa	OM-poor	Bulk OM	0.21	-21.7		2.95567	13.3005	4.4335	30.5419	42.3645	6.40394
TW-51C	139.5	Waipawa	OM-poor	Bulk OM	0.36	-22.84		2.8169	11.2676	4.92958	43.662	29.8122	7.51174
TW-51A	138.5	Waipawa	OM-poor	Bulk OM	0.9	-21.03		3.01508	4.52261	0.502513	82.4121	5.02513	4.52261
TW-51	138	Waipawa	OM-rich	Bulk OM	2.76	-18.89		0.518135	8.29016	7.77202	50.7772	25.3886	7.25389
TW-50	137	Waipawa	OM-rich	Bulk OM	3.27	-18.56		0	0.862069	0	98.2759	0.1	0.862069
TW-49	135.5	Waipawa	OM-rich	Bulk OM	3.79	-18.61		0.374532	3.74532	0.749064	76.4045	8.98876	9.73783
TW-47	132.5	Waipawa	OM-poor	Bulk OM	1.74	-16.67		0	0	0	86.5772	8.72483	4.69799
TW-44	128	"Whangai"		Bulk OM	1.23	-25.06		35.2403	22.4256	3.89016	22.6545	7.32265	8.46682
TW-43	126.5	Waipawa	OM-rich	Bulk OM	2.17	-21.52		0.966184	7.24638	6.28019	65.2174	15.4589	4.83092
TW-41	123.5	Waipawa	OM-rich	Bulk OM	2.21	-21.22		0	4.64135	2.95359	79.7468	9.2827	3.37553
TW-38	119	Waipawa	OM-rich	Bulk OM	4.53	-17.83		0	3.06748	6.13497	52.1472	23.3129	15.3374
TW-37	117.5	Waipawa	OM-rich	Bulk OM	4.62	-17.63		0	3.3419	5.9126	65.5527	20.8226	4.37018
TW-35	114.5	Waipawa	OM-poor	Bulk OM	1.61	-24.13		0.914634	6.40244	3.04878	61.5854	17.9878	10.061
TW-32	110	Waipawa	OM-poor	Bulk OM	1.49	-22.83		0.760456	7.98479	3.80228	70.7224	13.6882	3.04183
TW-31	108.5	Waipawa	OM-poor	Bulk OM	1.46	-22.08		0.261097	7.3107	14.3603	47.5196	20.6266	9.92167
TW-29	105.5	Waipawa	OM-rich	Bulk OM	3.96	-18		0	6.09481	3.386	55.9819	27.088	7.44921
TW-26	101	Waipawa	OM-poor	Bulk OM	1.94	-20.8		0.990099	2.9703	5.44554	65.8416	21.7822	2.9703
TW-25	99.5	Waipawa	OM-rich	Bulk OM	2.42	-19.45		0	0.421941	1.68776	83.5443	8.43882	5.90717
TW-23	96.5	Waipawa	OM-rich	Bulk OM	4.58	-17.38		0.657895	3.61842	1.64474	74.6711	10.5263	8.88158
TW-20	92	Waipawa	OM-rich	Bulk OM	2.54	-18.7		0	5.73248	7.00637	67.1975	17.1975	2.86624
TW-19	90.5	Waipawa	OM-poor	Bulk OM	1.41	-23.25		1.35135	3.37838	2.36486	61.8243	15.2027	15.8784
TW-17	87.5	Waipawa	OM-rich	Bulk OM	3.18	-18.2		1.4218	0.473934	0	78.1991	18.9573	0.947867
TW-16	86	Waipawa	OM-rich	Bulk OM	2.91	-18.8		2.51046	3.34728	8.78661	62.7615	19.6653	2.92887
TW-14	83	Waipawa	OM-rich	Bulk OM	2.02	-20.44		0.600601	12.3123	3.6036	46.8468	19.5195	17.1171
TW-13	81.5	Waipawa	OM-poor	Bulk OM	1.76	-21.24		0	4.58015	1.52672	72.1374	11.8321	9.92366
TW-12	77	Waipawa	OM-poor	Bulk OM	0.98	-22.34		0	2.26244	7.23982	57.4661	26.6968	6.33484
TW-11	72.5	Waipawa	OM-poor	Bulk OM	1.05	-22.8		0	7.46888	2.07469	53.527	21.5768	15.3527
TW-10	68	Waipawa	OM-poor	Bulk OM	0.49	-23.2		0	0	0.961538	59.1346	36.5385	2.88462
TW-9	63.5	Whangai		Bulk OM	0.8	-26.57		40.5316	14.2857	2.65781	17.2757	20.598	4.65116
TW-8	59	Whangai		Bulk OM	0.59	-26.4		1.0453	21.2544	0.696864	45.993	25.784	5.22648
TW-7	54.5	Whangai		Bulk OM	0.94	-26.19		55.6213	8.28402	3.5503	17.4556	9.1716	5.91716
TW-6	32	Whangai		Bulk OM	0.94	-27.08		78.6364	7.27273	0.909091	4.09091	3.63636	5.45455
TW-2	5.5	Waipawa	OM-rich	Bulk OM	2.93	-17.64		0	2.73973	2.73973	73.516	15.0685	5.93607
TW-51 (1.23 < SG < 1.25)	138	Waipawa	OM-rich	Light		-18.19		0	1.65746	0.552486	72.3757	22.6519	2.76243
TW-51 (1.25 < SG < 1.27)	138	Waipawa	OM-rich	Light		-18.38		1.14943	0.574713	0	94.8276	3.44828	0
TW-51 (1.27 < SG < 1.30)	138	Waipawa	OM-rich	Light		-18.7		2.8777	0	0	94.964	1.43885	0.719424
TW-51 (SG ~ 1.23)	138	Waipawa	OM-rich	Light		-19.18		0	1.25786	1.25786	74.8428	16.9811	5.66038
TW-51 (SG < 1.23)	138	Waipawa	OM-rich	Light		-21.86		0.862069	0.862069	3.44828	75.8621	14.6552	4.31034
TW-50 (1.22 < SG < 1.25)	137	Waipawa	OM-rich	Light				4.13223	0.826446	0.826446	46.281	42.1488	5.78512
TW-50 (1.25 < SG < 1.3)	137	Waipawa	OM-rich	Light		-19.62	-19.28	0	8.25083	16.1716	53.1353	14.8515	7.59076
TW-50 (SG < 1.25)	137	Waipawa	OM-rich	Light		-22.41	-20.87	0	5.33333	5.77778	67.5556	15.5556	5.77778
TW-44 (1.25 < SG < 1.3)	128	"Whangai"		Light		-23.2		1.08108	30.2703	0.540541	44.8649	19.4595	3.78378
TW-44 (SG < 1.2)	128	"Whangai"		Light		-22		0	62.1429	1.42857	15.7143	10.7143	10
TW-44 (SG < 1.25)	128	"Whangai"		Light		-20.18		0	70.5128	1.28205	11.5385	11.5385	5.12821
TW-31 (1.25 < SG < 1.27)	108.5	Waipawa	OM-poor	Light				0	6.27451	18.0392	30.9804	30.5882	14.1176
TW-31 (SG < 1.25)	108.5	Waipawa	OM-poor	Light				0	4.33437	8.04954	50.774	24.7678	12.0743
TW-25 (1.25 < SG < 1.3)	99.5	Waipawa	OM-rich	Light		-20.54	-20.66	0	3.50877	17.1053	50.8772	17.1053	11.4035
TW-25 (SG < 1.25)	99.5	Waipawa	OM-rich	Light		-23.26	-22.2	0	4.08163	5.61224	67.8571	15.8163	6.63265
TW-23 (1.23 < SG < 1.25)	96.5	Waipawa	OM-rich	Light		-20.24		1.13636	1.13636	2.84091	85.2273	5.11364	3.40909
TW-23 (1.25 < SG < 1.3)	96.5	Waipawa	OM-rich	Light		-16.97		0	0	0	88.4393	11.5607	0
TW-23 (SG < 1.2)	96.5	Waipawa	OM-rich	Light		-21.78		0	0	4.0201	85.4271	7.03518	3.51759
TW-23 (SG < 1.23)	96.5	Waipawa	OM-rich	Light		-21.36		0	2.04082	7.65306	75.5102	10.7143	4.08163
TW-13 (1.23 < SG < 1.25)	81.5	Waipawa	OM-poor	Light		-22.29		0	26.7123	5.47945	46.5753	12.3288	8.90411
TW-13 (1.25 < SG < 1.27)	81.5	Waipawa	OM-poor	Light		-20.87		0	11.5	2.5	63	19.5	3.5
TW-13 (1.27 < SG < 1.3)	81.5	Waipawa	OM-poor	Light				1.06383	1.59574	0	92.0213	4.25532	1.06383
TW-13 (SG ~ 1.23)	81.5	Waipawa	OM-poor	Light		-22.98		0	21.9653	13.2948	45.0867	9.82659	9.82659
TW-13 (SG < 1.23)	81.5	Waipawa	OM-poor	Light		-24.32		0	15.7025	9.50413	49.5868	20.2479	4.95868
TW-07 (1.25 < SG < 1.3)	54.5	Whangai		Light		-25.71		0	39.2226	5.65371	22.9682	8.12721	24.0283
TW-07 (1.3 < SG < 1.4)	54.5	Whangai		Light		-25.59		0	7.9096	2.25989	44.0678	39.548	6.21469
TW-07 (SG < 1.25)	54.5	Whangai		Light		-25.74		0	34.7639	4.29185	21.4592	10.7296	28.7554
TW-02 (1.25 < SG < 1.3)	5.5	Waipawa	OM-rich	Light		-18.33		0	2.5	4	73.5	13.5	6.5
TW-02 (SG < 1.25)	5.5	Waipawa	OM-rich	Light		-21.93		0.414938	4.56432	17.4274	51.4523	16.5975	9.54357
TW-51 (1.3 < SG)	138	Waipawa	OM-rich	Heavy				0	0	0	90.7563	8.40336	0
TW-50 (1.3 < SG < 1.4)	137	Waipawa	OM-rich	Heavy		-18.34	-18.89	0	2.54545	8.36364	57.4545	25.4545	6.18182
TW-50 (1.4 < SG < 1.5)	137	Waipawa	OM-rich	Heavy		-20.66	-18.93	0	0.540541	6.48649	23.2432	67.027	2.7027
TW-50 (1.5 < SG)	137	Waipawa	OM-rich	Heavy		-19.37	-19.08	0	3.27869	8.46995	45.9016	32.7869	9.56284
TW-44 (1.3 < SG < 1.4)	128	"Whangai"		Heavy		-23.47		8.97436	22.4359	0	26.9231	36.5385	4.48718
TW-44 (1.4 < SG < 1.5)	128	"Whangai"		Heavy		-24.09		33.3333	16.092	0.574713	22.4138	24.7126	2.87356
TW-44 (1.5 < SG)	128	"Whangai"		Heavy		-24.61		79.021	3.4965	0.699301	3.4965	11.1888	2.0979
TW-31 (1.27 < SG < 1.3)	108.5	Waipawa	OM-poor	Heavy				0.914634	10.6707	22.8659	18.9024	33.2317	13.4146
TW-31 (1.3 < SG)	108.5	Waipawa	OM-poor	Heavy				0.761421	3.5533	6.34518	11.1675	70.8122	7.36041
TW-25 (1.3 < SG < 1.4)	99.5	Waipawa	OM-rich	Heavy		-20.41	-20.42	0.442478	1.76991	3.09735	60.6195	29.646	4.42478
TW-25 (1.4 < SG < 1.5)	99.5	Waipawa	OM-rich	Heavy		-21.55	-21.42	0	0	2.38095	20.6349	75.3968	1.5873
TW-25 (1.5 < SG)	99.5	Waipawa	OM-rich	Heavy		-21	-21.14	0.5	0.5	6	50	37.5	5.5
TW-23 (1.3 < SG < 1.4)	96.5	Waipawa	OM-rich	Heavy		-17.02		0	0	0	88.024	11.976	0
TW-23 (1.4 < SG < 1.5)	96.5	Waipawa	OM-rich	Heavy		-17.56		0.564972	0.564972	1.12994	88.1356	9.03955	0
TW-23 (1.5 < SG)	96.5	Waipawa	OM-rich	Heavy		-17.86		0	0	0	89.3333	10	0.666667
TW-13 (1.3 < SG)	81.5	Waipawa	OM-poor	Heavy		-21.15		1.40845	0.469484	0.938967	83.5681	13.1455	0.469484
TW-07 (1.4 < SG < 1.5)	54.5	Whangai		Heavy		-21.14		0	1.21212	1.21212	5.45455	89.697	2.42424
TW-07 (1.5 < SG)	54.5	Whangai		Heavy		-21.12		0	1.21951	2.43902	8.53659	85.9756	1.82927
TW-02 (1.3 < SG < 1.4)	5.5	Waipawa	OM-rich	Heavy		-17.31		0	0	0	83.5106	15.9574	0.531915
TW-02 (1.4 < SG < 1.5)	5.5	Waipawa	OM-rich	Heavy				0	0	0	15.3061	84.6939	0
TW-02 (1.5 < SG)	5.5	Waipawa	OM-rich	Heavy				0	0	0	15.3153	84.6847	0
1 OM-rich = TOC >2.0%, OM-poor = TOC <2.0%
2 Light = SG <1.3, heavy = SG >1.3
