# Supplementary material for: Late Paleocene CO 2 drawdown, climatic cooling, and terrestrial denudation in the southwest Pacific
Source: Copernicus journal article supplement (doi:10.5194/cp-2021-122), 2021-09-17
Supplement: Supplementary file 1 [file cp-2021-122-supplement.zip › Table_S4_CSIA.xlsx]

## Sheet: Table S4
Table S4. Bulk organic matter, total hydrocarbon fraction and compound-specific carbon isotope data for Taylor White and additional sections.
Taylor White section	Added formation and facies columns
Sample details				TOC	Carbon isotopes (‰)
Sample no.	Height	Formation	Facies1	(wt%)	Bulk	HC fractions			Compound specific
	(m)				δ¹³COM	δ¹³CSat	δ¹³CAro	CV	Pr	Ph	nC18	nC19	nC20	nC21	nC22	nC23	nC24	nC25	nC26	nC27	nC28	nC29	nC30	nC31	nC32	nC33
TW-57	147.5	Wanstead	Wanstead	0.13	-25.43	-28.7	-28.1	-1.421
TW-55	144.5	Wanstead	Wanstead		-26.6						-30.0635	-30.7241	-30.0528	-29.7468	-29.3796	-30.0828	-29.4726	-29.8038	-29.4118	-28.9038	-29.5516	-30.5229	-30.0219	-31.4721	-29.969	-32.0038
TW-54	143	Wanstead	Wanstead	0.19	-26.8	-27.8
TW-53	141.5	Wanstead	Wanstead	0.27	-26.6	-28.6
TW-52	140	Waipawa	OM-poor	0.21	-21.7
TW-51C	139.5	Waipawa	OM-poor	0.36	-22.84
TW-51A	138.5	Waipawa	OM-poor	0.9	-21.03
TW-51	138	Waipawa	OM-rich	2.76	-18.89	-27.6	-22.8	7.562				-28.7021	-27.7176	-27.7871	-27.8797	-27.4706	-27.261	-27.3975	-27.9822	-28.3471	-29.7888	-30.1589	-30.5929	-31.2597	-31.8846	-31.2114
TW-50	137	Waipawa	OM-rich	3.27	-18.56
TW-49	135.5	Waipawa	OM-rich	3.79	-18.61	-27.1	-22.9	6.075	-26.6277	-25.5866		-28.5166	-27.4273	-27.4896	-27.7413	-27.1206	-26.794	-27.1549	-28.0162	-28.5323	-29.5235	-29.7401	-29.388	-31.1734	-28.2041	-31.1552
TW-47	132.5	Waipawa	OM-poor	1.74	-16.67
TW-44	128	Whangai	OM-poor	1.23	-25.06	-28.9	-26.9	1.749
TW-43	126.5	Waipawa	OM-rich	2.17	-21.52
TW-41	123.5	Waipawa	OM-rich	2.21	-21.22	-28.3	-24.2	6.225	-28.187	-29.5147				-28.3497	-29.1994	-28.0362	-27.8085	-28.2974	-28.4015	-28.5562	-29.4787	-31.1255	-30.2383	-32.3122	-31.182	-31.3707
TW-38	119	Waipawa	OM-rich	4.53	-17.83	-27.2	-23.3	5.44	-26.1605	-24.66
TW-37	117.5	Waipawa	OM-rich	4.62	-17.63	-29.6	-27	3.298	-25.3369	-25.5118
TW-35	114.5	Waipawa	OM-poor	1.61	-24.13								-28.757	-28.9946	-29.4171	-28.5083	-28.8304	-28.7723	-29.2102	-29.5882	-30.3674	-31.2638	-30.8832	-31.9297	-32.2996	-31.6584
TW-32	110	Waipawa	OM-poor	1.49	-22.83
TW-31	108.5	Waipawa	OM-poor	1.46	-22.08	-28.9	-27.3	0.861
TW-29	105.5	Waipawa	OM-rich	3.96	-18	-27.5	-22.9	7.087	-25.4549	-24.5123		-28.89	-27.1144	-27.2061	-27.4912	-26.9001	-27.151	-27.4612	-28.4476	-28.781	-30.3019	-30.1662	-29.7333	-31.3931	-30.6065	-29.9362
TW-26	101	Waipawa	OM-poor	1.94	-20.8
TW-25	99.5	Waipawa	OM-rich	2.42	-19.45	-27.6	-24.4	4.01	-26.5703	-26.4711
TW-23	96.5	Waipawa	OM-rich	4.58	-17.38	-27.4	-22.7	7.278	-25.6945	-23.8659		-28.0009	-27.1841	-28.1209	-28.3048	-27.2101	-27.3153	-26.8684	-27.9227	-28.1153	-29.3899	-29.5554	-29.9679	-30.9558	-31.9217	-31.2646
TW-20	92	Waipawa	OM-rich	2.54	-18.7
TW-19	90.5	Waipawa	OM-poor	1.41	-23.25	-28.8	-28.4	-1.834
TW-17	87.5	Waipawa	OM-rich	3.18	-18.2	-28.5	-24.7	5.621
TW-16	86	Waipawa	OM-rich	2.91	-18.8
TW-14	83	Waipawa	OM-rich	2.02	-20.44
TW-13	81.5	Waipawa	OM-poor	1.76	-21.24	-28.8	-25.6	4.382	-27.5108	-30.7014			-28.2156	-28.3809	-28.4219	-27.9382	-28.2463	-28.4475	-28.7846	-28.7684	-29.6908	-30.4426	-31.325	-31.658	-32.1568	-31.5668
TW-12	77	Waipawa	OM-poor	0.98	-22.34
TW-11	72.5	Waipawa	OM-poor	1.05	-22.8
TW-10	68	Waipawa	OM-poor	0.49	-23.2
TW-9	63.5	Whangai	Whangai	0.8	-26.57	-28.6	-28.5	-2.562
TW-8	59	Whangai	Whangai	0.59	-26.4
TW-7	54.5	Whangai	Whangai	0.94	-26.19	-28.6	-28.4	-2.34	-29.7267	-31.3127	-29.6119	-31.3533	-30.2146	-30.0203	-29.619	-30.6262	-29.1594	-28.9633	-28.8945	-29.256	-30.9	-30.5633	-30.4015	-31.9799	-30.7603	-31.0953
TW-6	32	Whangai	Whangai	0.94	-27.08
TW-5	26.5	Whangai	Whangai	1.06	-26.27	-29	-28.3	-1.106
TW-2	5.5	Waipawa	OM-rich	2.93	-17.64	-27.5	-25.9	0.427
	Max			4.62	-16.67	-27.1	-22.7	7.562	-25.3369	-23.8659	-29.6119	-28.0009	-27.1144	-27.2061	-27.4912	-26.9001	-26.794	-26.8684	-27.9227	-28.1153	-29.3899	-29.5554	-29.388	-30.9558	-28.2041	-29.9362
	Min			0.13	-27.08	-29.6	-28.5	-2.562	-29.7267	-31.3127	-30.0635	-31.3533	-30.2146	-30.0203	-29.619	-30.6262	-29.4726	-29.8038	-29.4118	-29.5882	-30.9	-31.2638	-31.325	-32.3122	-32.2996	-32.0038
	Difference			4.49	10.41	2.5	5.8	10.124	4.38986	7.44679	0.451584	3.35233	3.10017	2.81417	2.12772	3.72606	2.67853	2.93539	1.48911	1.47287	1.5101	1.70834	1.93707	1.35644	4.09553	2.06762
Correlation	δ13COM			0.81599	1	0.494097	0.807818	0.800915	0.964499	0.904459		0.968542	0.981047	0.9425	0.8846	0.954477	0.965669	0.958711	0.891249	0.754987	0.43768	0.642397	0.330855	0.588264	0.000877399	0.558466
Other sections and drillholes (Sykes and Zink, 2012, and GNS Science unpublished results)
Sample details				TOC	Carbon isotopes (‰)
Section/drillhole	GNS no.	Formation	Facies1	(wt%)	Bulk	HC fractions			Compound specific
					δ¹³COM	δ¹³CSat	δ¹³CAro	CV	Pr	Ph	nC18	nC19	nC20	nC21	nC22	nC23	nC24	nC25	nC26	nC27	nC28	nC29	nC30	nC31	nC32	nC33
Black's Quarry	E012	Waipawa	OM-rich	9.66	-20.2	-23.9	-22.2	-0.467	-27.1	-26	-27.7	-25.1	-25.3	-28	-28.4	-25.4	-27.1	-27.2	-26.7	-27.3	-27	-29.2	-28.1	-29.3	-30.8
Black's Quarry	E013	Waipawa	OM-rich	10.84	-19.3	-23.9	-22.2	-0.467	-26.4	-24.5	-26.8	-22.5		-32.8	-26.9	-26.8	-24.8	-25.5	-26.7	-26.1	-25.7	-30.3	-27.9	-29.4
Te Weraroa Stream	E105	Waipawa	OM-rich	3.45		-26.8	-23.8	3.318	-28.9	-28.3	-29.9	-25.1		-31.8	-26	-26	-24.8	-27.9	-28.1	-27.1	-25.4	-31.5	-30.6	-27.2
Te Weraroa Stream	E106	Waipawa	OM-rich	3.03		-25.6	-22.8	2.502
Angora Stream	E107	Waipawa	OM-rich	5.18		-28.2	-23.6	7.304	-24.4				-24.2	-26.5	-27	-27.3	-27.5	-27.1	-27.1	-27.1	-26.5	-27.2	-27.6	-26.9	-27.3	-27
Angora Stream	E108	Waipawa	OM-rich	3.05		-29.3
Angora Stream	E109	Waipawa	OM-rich	4.07		-28.7			-26.8	-24.3	-28.7	-29	-25.5	-29.3	-29.2	-27.5	-27.6	-27.3	-27.4	-27.5	-26.8	-28.1	-29.6	-27.8	-27.8	-28
Angora Stream	E110	Whangai	Whangai	1.7					-26.8	-27.8	-29.5	-26.4		-30.8	-30	-28.1	-28.7	-29.8	-26.2	-31.3	-29.8	-31.5	-27.3
Mead Stream	E111	Waipawa	OM-rich	2.94					-24.5		-29.2	-28.5		-27.5	-27.3	-27.5	-27.4	-27.2	-27.2	-27.4	-27.1	-27.3	-28.2	-27.2	-27.1	-26.9
Mead Stream	E112	Waipawa	OM-poor	0.9					-27.7	-28.8	-27.3	-29.6	-22.2	-27.8	-27.3	-27.4	-27.6	-27.6	-27.4	-27.7	-27.4	-27.7	-28.2	-27.3	-27.2	-27.1
Te Puia	E113	Waipawa	OM-rich	8.39		-24.3	-22.8	-0.787	-26.3	-23.7	-30.3	-26.2	-21	-29.3	-24	-27.7	-25.6	-27.4	-27.7	-28	-25.7	-32.5		-29.5
Kupe South-5	E051	Farewell	Coal	55.69		-29.7	-26.9
Kupe South-5	E052	Farewell	Shaly coal	27.49		-30.3	-27.2
Kupe South-5	E054	Farewell	Coal	56.71		-29.9	-27.5	2.947	-31.6	-31.9	-32.8	-31.2	-28.8	-30	-30.5	-30.4	-29.3	-29.9	-30.5	-30.9	-35.4	-34.3	-34.3	-27.9	-28.1
Kupe South-5	E055	Farewell	Coaly mudstone	3.33		-30.7			-26.6		-27.6	-28.2	-28.8	-28.4	-28.6	-27.9	-29.8	-28.6	-32.2	-31.3	-32	-32	-32
Kapuni-13	E056	Farewell	Coal	57.28		-30.2	-28.1
Kapuni-13	E057	Farewell	Coaly mudstone	6.72		-30.2	-28.5
Tara-1	E232	Taratu	Coal	62.3		-29.9	-27
Tara-1	E233	Taratu	Coal	64.8		-30.3	-28.8
Tara-1	E234	Taratu	Coal	66.8		-30	-27.3
1 OM-rich = TOC >2.0%, OM-poor = TOC <2.0%
