# Supplementary material for: Late Paleocene CO 2 drawdown, climatic cooling, and terrestrial denudation in the southwest Pacific
Source: Copernicus journal article supplement (doi:10.5194/cp-2021-122), 2021-09-17
Supplement: Supplementary file 1 [file cp-2021-122-supplement.zip › Table_S5_PyGCMS.xlsx]

## Sheet: Table S5
Table S5. Thiophenes/naphthalene and phenols/naphthalene ratios in pyrolysates of bulk samples from Taylor White section.
Sample details				TOC	δ13COM	Phenols/	Thiophenes/
Sample no.	Height (m)	Formation	Facies1	(wt%)	(‰)	naphthalene	naphthalene
TW-51	138	Waipawa	OM-rich	2.76	-18.89	3	17.9
TW-50	137	Waipawa	OM-rich	3.27	-18.56	3.2	19
TW-49	135.5	Waipawa	OM-rich	3.79	-18.61	3.2	18.1
TW-45	129.5	Waipawa	OM-rich	2.17	-21.15	3.2	17.3
TW-44	128	Whangai	Whangai	1.23	-25.06	1.5	9.6
TW-43	126.5	Waipawa	OM-rich	2.17	-21.52	2.6	15.4
TW-41	123.5	Waipawa	OM-rich	2.21	-21.22	2.9	19.4
TW-39	120.5	Waipawa	OM-rich	4.26	-18.55	4.8	16
TW-37	117.5	Waipawa	OM-rich	4.62	-17.63	4.3	13.2
TW-35	114.5	Waipawa	OM-poor	1.61	-24.13	1.1	11.2
TW-33	111.5	Waipawa	OM-poor	1.33	-20.56	1.7	4.2
TW-31	108.5	Waipawa	OM-poor	1.46	-22.08	2.4	5.2
TW-29	105.5	Waipawa	OM-rich	3.96	-18	3.4	13.2
TW-27	102.5	Waipawa	OM-poor	1.69	-21.61	2.6	6
TW-25	99.5	Waipawa	OM-rich	2.42	-19.45	3.3	15.3
TW-23	96.5	Waipawa	OM-rich	4.58	-17.38	4	18.2
TW-21	93.5	Waipawa	OM-rich	2.45	-19.64	2.7	14
TW-19	90.5	Waipawa	OM-poor	1.41	-23.25	2.5	6
TW-18	89	Waipawa	OM-rich	3.21	-18.63	3.8	11.5
TW-17	87.5	Waipawa	OM-rich	3.18	-18.2	3.7	5.6
TW-15	84.5	Waipawa	OM-rich	2.8	-17.71	3	4.3
TW-13	81.5	Waipawa	OM-poor	1.76	-21.24	2.4	7
TW-12	77	Waipawa	OM-poor	0.98	-22.34	1.6	3.1
TW-11	72.5	Waipawa	OM-poor	1.05	-22.8	1.3	4.4
TW-9	63.5	Whangai	Whangai	0.8	-26.57	0.7	6.8
TW-7	54.5	Whangai	Whangai	0.94	-26.19	1.1	6.8
TW-5	26.5	Whangai	Whangai	1.06	-26.27	1.2	10.5
TW-3	10	Waipawa	OM-poor	1.75	-21.05	2.4	6.6
TW-1	0	Whangai	Whangai	0.68	-26.16	1.1	4.6
1 OM-rich = TOC >2.0%, OM-poor = TOC <2.0%
