# Supplementary material for: Late Paleocene CO 2 drawdown, climatic cooling, and terrestrial denudation in the southwest Pacific
Source: Copernicus journal article supplement (doi:10.5194/cp-2021-122), 2021-09-17
Supplement: Supplementary file 1 [file cp-2021-122-supplement.zip › Table_S6_GDGTs&Fatty_acids.xlsx]

## Sheet: Table S6
Table S6. Tetraether lipid parameter values and fatty acid carbon isotope data for mid-Waipara River section samples. Isotope analyses were run in duplicate.
Sample no.	Height	Unit1	Dino	TOC	δ13COM	CaCO3	Tetraetherlipid parameters			Fatty acid carbon isotopes (‰)
	(m)		zone2	(wt%)	(‰)	(wt%)	TEX86	TEX86H SST	BIT	Low molecular weight fatty acids					Medium molecular weight fatty acids							High molecular weight fatty acids
								(°C)		C16	C16	C18	C18	C16–18	C20	C20	C22	C22	C24	C24	C20–24	C26	C26	C28	C28	C30	C30	C32	C32	C26–32	C28–30
MW49	132.535	Ashley	PETM	0.4	-32	0.206513	0.856915	34.0129	0.047459	-28.28	-29.641			-28.9605	-31.383	-31.712	-32.303	-33.797	-33.022	-30.457	-32.1123	-31.672	-30.344	-29.31	-28.69	-31.115	-31.97	-28.966	-28.555	-30.0778	-30.2712
MW48	132.065	Ashley	PETM	0.5	-32.4	0.125642	0.814877	32.5187	0.0848338	-29.792	-28.397			-29.0945			-32.97	-34.309	-33.965	-31.513	-33.1893
MW47	131.975	WGS-S	NZDP8	0.2	-27.7
MW46	131.105	WGS-S	NZDP8	0.3	-26	0.00411071	0.589712	22.9118	0.0715241	-29.548	-29.464	-29.516	-29.72	-29.562	-28.273	-28.602	-30.405	-30.785	-29.709	-30.378	-29.692	-27.779	-28.695	-29.005	-29.741					-28.805	-29.373
MW45	130.655	Waipawa	NZDP8	0.7	-17.9	0.0347226	0.521472	19.2586	0.0914467	-29.232	-27.272			-28.252				-29.241		-29.984	-29.6125	-27.251	-30.873	-28.554	-26.159	-30.103	-29.5	-31.135	-30.77	-29.2931	-28.579
MW44	130.005	Waipawa	NZDP8	1.8	-19.2
MW43	129.525	Waipawa	NZDP8	0.9	-20.3	0.0263875	0.518541	19.0911	0.0938872	-27.409	-28.195	-28.19	-26.232	-27.5065	-27.898	-27.572	-28.4	-27.806	-27.509	-27.064	-27.7082	-28.462	-29.214	-26.539	-28.482	-28.761	-29.726	-29.695	-29.232	-28.7639	-28.377
MW42	129.255	Waipawa	NZDP8	1.1	-19.1	0.0474369	0.500379	18.032	0.105622	-29.013	-28.039	-23.513	-29.524	-27.5223	-28.553	-29.918	-31.355	-31.528	-29.661	-29.375	-30.065	-31.565	-30.283	-31.869	-28.741	-28.305	-28.507	-29.449	-29.927	-29.8308	-29.3555
MW41	129.055	Waipawa	NZDP8	1.5	-20.2
MW40	128.375	Waipawa	NZDP8	1.6	-17.6	0.0538911	0.497235	17.8448	0.0823583	-25.892	-27.27			-26.581	-23.193	-23.43	-23.011	-23.291	-22.087	-22.498	-22.92	-24.864	-24.529	-27.619	-27.847	-29.011	-30.107	-30.042	-31.324	-28.1679	-28.646
MW39	126.385	Waipawa	NZDP8	0.5	-21.9	0.0341286	0.554683	21.0927	0.0940012	-28.954	-30.449	-31.696	-27.503	-29.6505	-29.166	-28.613	-31.829	-30.698	-30.957	-31.422	-30.4475	-31.324	-30.624	-28.616	-29.408	-28.933	-28.773	-30.326	-29.858	-29.7327	-28.9325
MW38	125.235	Waipawa	NZDP7	0.5	-21	0.0093369	0.539793	20.2844	0.0803535	-28.431	-28.249	-29.544	-29.819	-29.0108	-27.535	-28.71	-30.636	-30.492	-29.854	-29.521	-29.458	-30.214	-30.247	-30.745	-32.223	-29.562	-29.398	-29.111	-29.918	-30.1773	-30.482
MW37	123.515	Waipawa	NZDP7	0.4	-23.6	0.0342506	0.549611	20.8198	0.067958	-27.991	-28.031	-27.014	-27.192	-27.557	-27.257	-26.854	-29.426	-28.728	-27.088	-27.469	-27.8037	-27.318	-27.577	-30.045	-29.647	-32.757	-30.503	-29.229	-29.651	-29.5909	-30.738
MW36	122.295	WGS-S	NZDP7	0.2	-26
MW35	121.145	WGS-S	NZDP7	0.4	-25.8	0.0182202	0.552105	20.9543	0.0699837	-29.691	-31.499	-29.663	-29.611	-30.116	-30.401	-31.341	-31.232	-32.199	-30.56	-31.267	-31.1667	-31.133	-32.259	-31.06	-31.205	-30.444	-30.782	-29.689	-29.914	-30.8107	-30.8727
MW34	119.625	WGS-S	NZDP7	0.4	-26.1	0.0165756	0.549091	20.7917	0.0801019	-28.469	-30.067	-29.04	-27.743	-28.8297	-29.713	-28.514	-30.731	-31.787	-29.237	-29.502	-29.914	-30.245	-30.572	-28.618	-28.964	-31.095	-31.117	-30.451	-30.27	-30.1665	-29.9485
MW33	117.925	WGS-S	NZDP7	0.2	-29.4	0.0179792	0.587886	22.8197	0.061872	-30.259	-30.257			-30.258					-32.377	-31.587	-31.982
MW32	116.405	WGS-S	NZDP7	0.1	-28.7
MW31	114.885	WGS-S	NZDP7	0.2	-29	0.0143595	0.551821	20.939	0.062	-28.736	-28.878	-31.102	-30.105	-29.7053	-30.768	-30.438	-32.798	-32.75	-31.888	-31.8	-31.7403	-31.923	-31.931	-31.085	-30.95	-30.154	-29.478	-31.271	-30.358	-30.8938	-30.4168
MW30	112.175	WGS-S	NZDP7	0.34	-26.5
MW29	110.075	WGS-S	NZDP7	0.110673	-26.0596	0.0292946	0.544378	20.5356	0.051862	-29.641	-29.009	-28.531	-29.009	-29.0475	-29.281	-28.336	-30.929	-30.976	-28.705	-28.169	-29.3993	-28.703	-29.561	-29.276	-29.258	-29.838	-29.362	-30.755	-31.194	-29.7434	-29.4335
MW52	101.165	WGS-S	NZDP7	0.109839	-27.0058	0.00490952	0.561354	21.4478	0.0668363	-31.534	-31.144	-32.815	-32.972	-32.1163	-33.387	-33.076	-34.202	-33.98	-33.507	-33.81	-33.6603	-34.349	-34.321	-33.923	-33.377	-29.82	-30.099	-31.178	-30.527	-32.1992	-31.8048
MW53	93.695	WGS-S	NZDP6	0.218993	-26.024	0.0440893	0.576865	22.2575	0.05	-30.246	-29.279	-31.427	-31.873	-30.7063	-32.15	-31.397	-33.08	-32.913	-32.024	-31.936	-32.25	-31.234	-32.124	-32.138	-31.604	-33.597	-34.604	-33.536	-33.067	-32.738	-32.9857
MW54	88.675	WGS-S	NZDP6	0.38	-25.7
MW56	79.655	WGS-ME	NZDP5	0.23	-27.1	0.0427952	0.597046	23.279	0.0506029	-33.14	-33.218	-35.828	-35.581	-34.4417	-33.091	-33.497	-32.952	-32.852	-32.252	-32.335	-32.8298	-32.638	-33.071	-32.456	-33.257	-30.16	-33.063			-32.4408	-32.234
MW57	70.415	WGS-ME	NZDP5	0.14	-27	0.241549	0.591863	23.0199	0.0600955	-30.324	-32.252	-31.253	-33.442	-31.8178	-33.713	-32.725	-33.714	-34.485	-33.246	-33.604	-33.5812	-33.166	-34.052	-31.649	-33.099	-31.486	-32.391	-31.309	-31.597	-32.3436	-32.1562
MW58	64.805	WGS-ME	NZDP5	0.0684913	-27.5441	0.284101	0.56293	21.5311	0.0691732	-30.164	-30.324	-30.314	-29.971	-30.1932	-32.987	-32.9	-33.156	-32.906	-32.272	-32.306	-32.7545	-32.639	-33.043	-33.06	-32.617	-34.212	-33.866			-33.2395	-33.4387
MW59	63.835	Loburn	NZDP5	0.19	-27.7
MW60	62.225	Loburn	NZDP4	0.264002	-27.0642	0.7301	0.583505	22.5975	0.0630825	-30.763	-30.343	-32.384	-31.55	-31.26	-31.926	-32.3	-33.115	-33.147	-30.785	-30.43	-31.9505	-32.584	-31.546	-33.116	-32.518	-32.246	-31.734	-32.166	-31.843	-32.2191	-32.4035
MW62	58.315	Loburn	NZDP4	0.441595	-27.8613	1.01113	0.628067	24.7836	0.0652366	-31.91	-31.845	-32.221	-32.845	-32.2052	-34.304	-34.403	-34.121	-33.759	-33.59	-33.861	-34.0063	-34.013	-34.011	-33.754	-33.47					-33.812	-33.612
MW63	53.815	Loburn	NZDP4	0.55	-27.7	0.923794	0.583239	22.5839	0.0539371	-29.318	-29.894	-30.266	-30.162	-29.91	-31.546	-32.015	-32.669	-32.406	-32.14	-31.581	-32.0595	-31.245	-31.884	-31.659	-30.677	-33.143	-33.128	-32.78	-32.029	-32.0681	-32.1517
		Correlation	TOC	1	0.82571	-0.061484	-0.687083	-0.708775	0.667244	0.670847	0.587727	0.632866	0.465615	0.668026	0.730789	0.641886	0.791909	0.795422	0.747888	0.741936	0.762611	0.588128	0.680032	0.520473	0.628884	0.52024	0.421506	0.406885	0.211919	0.60149	0.583195
			δ13COM	0.82571	1	-0.346219	-0.808285	-0.818977	0.794819	0.637975	0.68978	0.63341	0.553129	0.699334	0.812176	0.742707	0.764925	0.784082	0.754438	0.686284	0.742889	0.661172	0.653357	0.624888	0.726986	0.587466	0.578453	0.547485	0.370619	0.728248	0.733293
			TEX86	-0.687083	-0.808285	0.544334	1	0.999331	-0.696658	-0.763537	-0.77033	-0.736369	-0.674554	-0.818757	-0.77499	-0.744926	-0.706212	-0.709283	-0.738867	-0.737435	-0.751565	-0.610251	-0.640922	-0.60254	-0.741039	-0.620814	-0.712804	-0.657368	-0.524151	-0.748187	-0.763454
1 WGS-S = xxxx?; WGS-ME = xxx?
2 New Zealand dinoflagellate zones (Cooper, 2004). PETM = Paleocene–Eocene Thermal Maximum
