# Supplementary material for: Late Paleocene CO 2 drawdown, climatic cooling, and terrestrial denudation in the southwest Pacific
Source: Copernicus journal article supplement (doi:10.5194/cp-2021-122), 2021-09-17
Supplement: Supplementary file 1 [file cp-2021-122-supplement.zip › Table_S7_Mead Str carbonate+age.xlsx]

## Sheet: Table S7
Table S7. Bulk carbonate stable carbon isotope values and refined age estimates for Mead Stream section
Sample no.	Height	Formation	Carbonate		Age
	(m)		δ13C (‰)	Wt. (%)	(Myr)
BA-MD26	120.744	Amuri Lst	3.13		57.9314
BA-MD25	118.32	Amuri Lst	3.14	76.79	58.0349
MS-J31	118.03	Amuri Lst	3.27	69.6925	58.0473
MS-J30	117.08	Amuri Lst	3.35	64.2504	58.0878
BA-MD24	116.74	Amuri Lst	3.02	59.65	58.1023
MS-J29	116.35	Amuri Lst	3.14	58.4109	58.119
MD15-CH066	116.18	Amuri Lst	3.11		58.1262
MD15-CH067	116.06	Amuri Lst	2.82		58.1313
MD15-CH068	115.89	Amuri Lst	3.02		58.1386
MD15-CH069	115.75	Amuri Lst	3.03		58.1446
BA-MD23	115.72	Waipawa?	2.57	5.44	58.1459
MS23	115.63	Waipawa?	2.15	4.67542	58.15
BA-MD22	115.62	Waipawa?	2.46	7.69	58.1505
MD15-CH070	115.6	Waipawa?	2.55		58.1515
BA-MD21	115.5	Waipawa?	1.67	2.86	58.1567
MS26	115.44	Amuri Lst	2.82	14.67	58.1598
MD15-CH071	115.422	Amuri Lst	2.94		58.1607
MD15-CH072	115.25	Amuri Lst	2.89		58.1695
MD15-CH073	115.031	Amuri Lst	2.95		58.1808
BA-MD20	114.98	Amuri Lst	3.05	24.15	58.1834
MD15-CH074	114.897	Amuri Lst	2.93		58.1877
MD15-CH075	114.62	Amuri Lst	3.12		58.202
MD15-CH076	114.143	Amuri Lst	2.91		58.2265
MD15-CH077	113.808	Amuri Lst	3.18		58.2437
MD15-CH078	113.388	Amuri Lst	3.33		58.2653
MD15-CH079	112.968	Amuri Lst	3.35		58.2869
MD15-CH080	112.729	Amuri Lst	3.37		58.2992
MS14	112.53	Amuri Lst	3.22	70.488	58.3095
MD15-CH081	112.299	Amuri Lst	3.33		58.3213
MD15-CH082	111.726	Amuri Lst	3.37		58.3508
MD15-CH084	111.64	Amuri Lst	3.09		58.3552
MS15	111.53	Amuri Lst	3.32	63.27	58.3609
BA-MD19	111.28	Amuri Lst	3.11	69.19	58.3738
BA-MD18C	111.18	Amuri Lst		6.59	58.3789
BA-MD18H	111.18	Amuri Lst	2.99	81.91	58.3789
MD15-CH083	111.058	Amuri Lst	3.33		58.3852
MD15-CH085	110.876	Amuri Lst	3.1		58.3945
BA-MD17	110.67	Waipawa		1.91	58.4295
MD15-CH086	110.655	Waipawa	2.99		58.4339
BA-MD16	110.54	Waipawa		1.33	58.4678
BA-MD15	110.48	Waipawa		2.05	58.4855
MS12	110.24	Waipawa	1.95	1.26207	58.5563
BA-MD14	110.08	Waipawa		1.91	58.6035
BA-MD13	109.9	Waipawa		1.12	58.6566
MS11	109.7	Waipawa	2.2	2.27	58.7156
BA-MD12	109.24	Waipawa		0.83	58.8513
BA-MD10	108.84	Waipawa		2.06	58.9693
BA-MD09	108.72	Waipawa		1.25	59.0047
MD15-CH087	108.68	Waipawa			59.0165
MD15-CH088	108.505	Waipawa			59.0681
BA-MD08	108.46	Waipawa		1.37	59.0814
BA-MD11	108.36	Waipawa		1.24	59.1109
MD15-CH089	108.355	Waipawa	1.25		59.1124
MS1A	108.3	Waipawa		3.63	59.1286
BA-MD07	108.28	Waipawa		2.27	59.1345
MD15-CH090	108.165	Mead Hill	2.06		59.1534
BA-MD06	108.14	Mead Hill		23.64	59.1547
MD15-CH091	108	Mead Hill	2.62		59.162
BA-MD05	107.99	Mead Hill		18.04	59.1626
MD15-CH092	107.82	Mead Hill	3.29		59.1715
MS18	107.8	Mead Hill	2.81	74.3718	59.1725
MD15-CH093	107.34	Mead Hill	3.24		59.1966
BA-MD03	107.33	Mead Hill		36.55	59.1971
BA-MD02	107.08	Mead Hill		39.69	59.2102
MD-F12	107.08	Mead Hill	2.78	78.2402	59.2102
MD15-CH094	106.94	Mead Hill	2.9		59.2175
BA-MD00	106.8	Mead Hill		59.82	59.2248
MD15-CH095	106.64	Mead Hill	2.92		59.2332
MD-F13	106.57	Mead Hill	2.82	63.043	59.2369
MD15-CH096	106.325	Mead Hill	2.81		59.2497
MD15-CH097	106.16	Mead Hill	3		59.2583
MD15-CH098	105.86	Mead Hill	3.07		59.274
MD15-CH099	105.435	Mead Hill	2.84		59.2963
MD15-CH100	105.17	Mead Hill	3.1		59.3101
MD15-CH101	104.78	Mead Hill	3.34		59.3305
